# Supplementary material for: A copper(ii) perchlorate-promoted tandem reaction of internal alkynol and salicyl N-tosylhydrazone: direct access to isochromeno[3,4-b]chromene
Source: Royal Society of Chemistry journal article supplement (doi:10.1039/c4cc02862g), 2014-01-01

# Supporting Information

## **Copper(II) perchlorate-promoted tandem reaction of internal alkynol and salicyl *N*-tosylhydrazone: direct access to isochromeno[3,4-*b*]chromene**

Hai Xiao Siyang, Xu Rui Wu, Xiao Yue Ji, Xin Yan Wu and Pei Nian Liu\*

*Shanghai Key Laboratory of Functional Materials Chemistry and Institute of Fine Chemicals, East*

*China University of Science and Technology, Meilong Road 130, Shanghai, China*

*liupn@ecust.edu.cn*

### **Table of Contents**

|                                                                                     | Page           |
|-------------------------------------------------------------------------------------|----------------|
| <b>1. General information.....</b>                                                  | <b>S1</b>      |
| <b>2. Experimental procedures.....</b>                                              | <b>S1</b>      |
| <b>3. Analytical data for the products.....</b>                                     | <b>S1-S15</b>  |
| <b>4. Crystal data and structure refinement of product <b>3a</b> .....</b>          | <b>S16-S22</b> |
| <b>5. Copies of <sup>1</sup>H and <sup>13</sup>C NMR spectra for products .....</b> | <b>S23-S46</b> |

## 1. General Information

All manipulations were carried out under a nitrogen or argon atmosphere using standard Schlenk techniques, unless otherwise stated. Solvents were distilled under nitrogen from sodium-benzophenone (THF, toluene, dioxane) or calcium hydride (CH<sub>3</sub>CN, CH<sub>3</sub>NO<sub>2</sub>, DCE). Chemical shifts ( $\delta$ , ppm) in the <sup>1</sup>H NMR spectra were recorded using TMS as internal standard. Chemical shifts in <sup>13</sup>C{<sup>1</sup>H} NMR spectra were internally referenced to CDCl<sub>3</sub> ( $\delta$  = 77.1 ppm).

## 2. Experimental procedures

Typical procedure for the tandem reaction of substituted internal alkynol **1** with various salicyl tosylhydrazone **2** catalyzed by Cu(ClO<sub>4</sub>)<sub>2</sub>·6H<sub>2</sub>O.

**Procedure:** To a mixture of internal alkynol **1** (0.6 mmol) and salicyl *N*-tosylhydrazone **2** (0.3 mmol) in a mixture solvent (toluene:dioxane= 1:4, v/v, 2 ml) was added the copper(II) perchlorate (0.09 mmol, 30 mol%) under Ar. The reaction mixture was stirred at 60 °C for 11 hours and the progress was monitored using TLC detection. After completion of present reaction, the solvent was evaporated under reduced pressure and the residue passed through flash column chromatography on silica gel to afford the desired products **3**.

## 3. Analytical data for products.

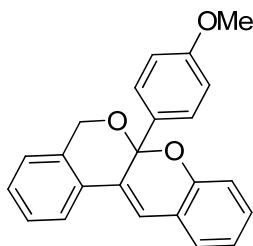

**6a-(4-methoxyphenyl)-5,6a-dihydroisochromeno[3,4-*b*]chromene (3a).** The compound was prepared from **1a** (0.143 g, 0.6 mmol) and **2a** (0.087 g, 0.3 mmol) following typical procedure: 0.096 g (94% yield) of product was obtained after column chromatography (eluent = petroleum ether/ ethyl acetate 100:1 v/v) as white solid, mp 137.3-139.1 °C; <sup>1</sup>H NMR (400 MHz, CDCl<sub>3</sub>, 25 °C)  $\delta$  7.84 (d, *J* = 7.8 Hz, 1H), 7.42 (d, *J* = 8.8 Hz, 2H), 7.35 (t, *J* = 7.4 Hz, 1H), 7.23-7.26 (m, 1H), 7.14-7.17 (m, 3H), 7.02 (d, *J* = 7.5 Hz, 1H), 6.87-6.94 (m, 2H), 6.74 (d, *J* = 8.8 Hz, 2H), 4.94 (d, *J* = 14.8 Hz, 1H), 4.61

(d,  $J = 14.8$  Hz, 1H), 3.70 (s, 3H);  $^{13}\text{C}$  NMR (100.6 MHz,  $\text{CDCl}_3$ , 25 °C)  $\delta$  160.0, 151.6, 133.9, 131.2, 130.9, 129.5, 128.2, 127.9, 127.8, 127.4, 127.1, 124.6, 123.3, 122.6, 121.9, 119.2, 116.5, 113.6, 102.0, 65.0, 55.2; HRMS (ESI, TOF) calcd for  $\text{C}_{23}\text{H}_{19}\text{O}_3$   $[\text{M}+\text{H}]^+$  343.1334, found 343.1331.

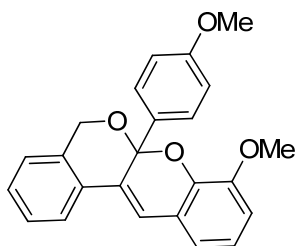

**8-methoxy-6a-(4-methoxyphenyl)-5,6a-dihydroisochromeno[3,4-*b*]chromene (3b).**

The compound was prepared from **1a** (0.143 g, 0.6 mmol) and **2b** (0.096 g, 0.3 mmol) following typical procedure: 0.078 g (70% yield) of product was obtained after column chromatography (eluent = petroleum ether/ ethyl acetate 20:1 v/v) as white solid, mp 191.9-193.8 °C;  $^1\text{H}$  NMR (400 MHz,  $\text{CDCl}_3$ , 25 °C)  $\delta$  7.81 (d,  $J = 7.7$  Hz, 1H), 7.43 (d,  $J = 8.8$  Hz, 2H), 7.37 (t,  $J = 7.3$  Hz, 1H), 7.24-7.28 (m, 1H), 7.08 (d,  $J = 7.5$  Hz, 1H), 7.05 (s, 1H), 6.82-6.86 (m, 1H), 6.75-6.79 (m, 2H), 6.73 (d,  $J = 8.9$  Hz, 2H), 4.96 (d,  $J = 14.3$  Hz, 1H), 4.64 (d,  $J = 14.3$  Hz, 1H), 3.87 (s, 3H), 3.69 (s, 3H);  $^{13}\text{C}$  NMR (100.6 MHz,  $\text{CDCl}_3$ , 25 °C)  $\delta$  159.9, 148.3, 140.9, 134.4, 132.0, 131.7, 128.2, 127.9, 127.8, 127.8, 124.6, 123.5, 123.3, 121.5, 120.0, 119.2, 113.4, 112.6, 102.4, 65.1, 56.3, 55.2; HRMS (ESI, TOF) calcd for  $\text{C}_{24}\text{H}_{21}\text{O}_4$   $[\text{M}+\text{H}]^+$  373.1440, found 373.1443.

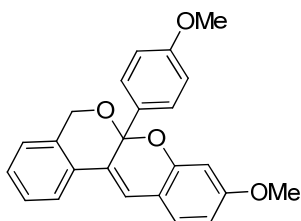

**9-methoxy-6a-(4-methoxyphenyl)-5,6a-dihydroisochromeno[3,4-*b*]chromene (3c).**

The compound was prepared from **1a** (0.143 g, 0.6 mmol) and **2c** (0.096 g, 0.3 mmol) following typical procedure: 0.079 g (71% yield) of product was obtained after column chromatography (eluent = petroleum ether/ ethyl acetate 25:1 v/v) as white solid, mp 169.8-171.8 °C;  $^1\text{H}$  NMR (400 MHz,  $\text{CDCl}_3$ , 25 °C)  $\delta$  7.80 (d,  $J = 7.8$  Hz, 1H), 7.43 (d,  $J$

= 8.8 Hz, 2H), 7.34 (t,  $J = 7.5$  Hz, 1H), 7.22 (t,  $J = 7.5$  Hz, 1H), 7.10 (s, 1H), 7.07 (d,  $J = 8.4$  Hz, 1H), 7.01 (d,  $J = 7.5$  Hz, 1H), 6.76 (d,  $J = 8.8$  Hz, 2H), 6.50-6.51 (m, 1H), 6.46 (dd,  $J_1 = 2.4$  Hz,  $J_2 = 8.4$  Hz, 1H), 4.92 (d,  $J = 14.6$  Hz, 1H), 4.61 (d,  $J = 14.6$  Hz, 1H), 3.75 (s, 3H), 3.71 (s, 3H);  $^{13}\text{C}$  NMR (100.6 MHz,  $\text{CDCl}_3$ , 25 °C)  $\delta$  161.0, 160.0, 152.9, 133.6, 131.5, 131.2, 128.2, 127.9, 127.7, 127.4, 124.6, 124.5, 123.0, 119.1, 115.8, 113.6, 108.1, 102.2, 102.1, 65.1, 55.4, 55.2; HRMS (ESI, TOF) calcd for  $\text{C}_{24}\text{H}_{21}\text{O}_4$   $[\text{M}+\text{H}]^+$  373.1440, found 373.1440.

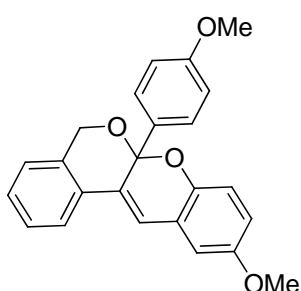

**10-methoxy-6a-(4-methoxyphenyl)-5,6a-dihydroisochromeno[3,4-*b*]chromene (3d).**

The compound was prepared from **1a** (0.143 g, 0.6 mmol) and **2d** (0.096 g, 0.3 mmol) following typical procedure: 0.072 g (64% yield) of product was obtained after column chromatography (eluent = petroleum ether/ ethyl acetate 50:1 v/v) as white solid, mp 172.2-173.8 °C;  $^1\text{H}$  NMR (400 MHz,  $\text{CDCl}_3$ , 25 °C)  $\delta$  7.84 (d,  $J = 7.4$  Hz, 1H), 7.36-7.43 (m, 4H), 7.12 (s, 1H), 7.03 (d,  $J = 6.1$  Hz, 1H), 6.86 (d,  $J = 8.3$  Hz, 1H), 6.66-6.76 (m, 4H), 4.93 (d,  $J = 14.9$  Hz, 1H), 4.59 (d,  $J = 14.3$  Hz, 1H), 3.74 (s, 3H), 3.71 (s, 3H);  $^{13}\text{C}$  NMR (100.6 MHz,  $\text{CDCl}_3$ , 25 °C)  $\delta$  160.0, 154.4, 145.6, 134.0, 131.0, 130.8, 128.2, 128.2, 128.0, 127.7, 124.6, 123.2, 123.1, 119.1, 117.1, 115.0, 113.5, 111.6, 102.0, 64.9, 55.7, 55.2; HRMS (ESI, TOF) calcd for  $\text{C}_{24}\text{H}_{21}\text{O}_4$   $[\text{M}+\text{H}]^+$  373.1440, found 373.1432.

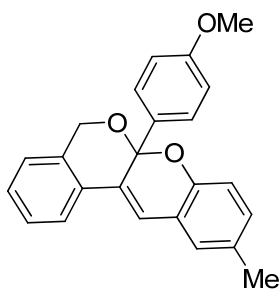

**6a-(4-methoxyphenyl)-10-methyl-5,6a-dihydroisochromeno[3,4-*b*]chromene (3e).**

The compound was prepared from **1a** (0.143 g, 0.6 mmol) and **2e** (0.091 g, 0.3 mmol) following typical procedure: 0.078 g (73% yield) of product was obtained after column chromatography (eluent = petroleum ether/ ethyl acetate 50:1 v/v) as white solid, mp 139.7-141.9 °C; <sup>1</sup>H NMR (400 MHz, CDCl<sub>3</sub>, 25 °C) δ 7.84 (d, *J* = 7.7 Hz, 1H), 7.42 (d, *J* = 8.9 Hz, 2H), 7.35 (t, *J* = 7.3 Hz, 1H), 7.22-7.24 (m, 1H), 7.11 (s, 1H), 7.02 (d, *J* = 7.5 Hz, 1H), 6.95-6.96 (m, 1H), 6.89-6.92 (m, 1H), 6.82-6.84 (m, 1H), 6.74 (d, *J* = 8.9 Hz, 2H), 4.93 (d, *J* = 14.8 Hz, 1H), 4.59 (d, *J* = 14.8 Hz, 1H), 3.70 (s, 3H), 2.23 (s, 3H); <sup>13</sup>C NMR (100.6 MHz, CDCl<sub>3</sub>, 25 °C) δ 159.9, 149.4, 133.8, 131.1, 131.0, 130.9, 130.1, 128.2, 127.8, 127.7, 127.4, 127.3, 124.5, 123.1, 122.3, 119.2, 116.1, 113.5, 101.9, 64.9, 55.1, 20.6; HRMS (ESI, TOF) calcd for C<sub>24</sub>H<sub>21</sub>O<sub>3</sub> [M+H]<sup>+</sup> 357.1491, found 357.1492.

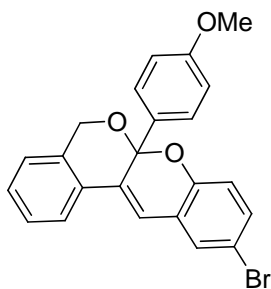

**10-bromo-6a-(4-methoxyphenyl)-5,6a-dihydroisochromeno[3,4-*b*]chromene (3f).** The compound was prepared from **1a** (0.143 g, 0.6 mmol) and **2f** (0.110 g, 0.3 mmol) following typical procedure: 0.094 g (75% yield) of product was obtained after column chromatography (eluent = petroleum ether/ ethyl acetate 25:1 v/v) as white solid, mp 173.5-175.2 °C; <sup>1</sup>H NMR (400 MHz, CDCl<sub>3</sub>, 25 °C) δ 7.83 (d, *J* = 7.8 Hz, 1H), 7.35-7.41 (m, 3H), 7.26-7.29 (m, 2H), 7.18 (d, *J* = 8.6 Hz, 1H), 7.08 (s, 1H), 7.03 (d, *J* = 7.6 Hz, 1H), 6.81 (d, *J* = 8.5 Hz, 1H), 6.76 (d, *J* = 8.4 Hz, 2H), 4.94 (d, *J* = 14.8 Hz, 1H), 4.60 (d, *J* = 14.8 Hz, 1H), 3.72 (s, 3H); <sup>13</sup>C NMR (100.6 MHz, CDCl<sub>3</sub>, 25 °C) δ 160.2, 150.5, 134.0, 131.9, 130.5, 130.2, 129.3, 128.6, 128.4, 128.2, 127.9, 124.6, 124.5, 123.3, 118.3, 117.7, 114.0, 113.7, 102.1, 65.0, 55.2; HRMS (ESI, TOF) calcd for C<sub>23</sub>H<sub>18</sub>O<sub>3</sub>Br [M+H]<sup>+</sup> 421.0439, found 421.0428.

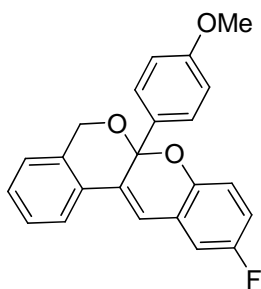

**10-fluoro-6a-(4-methoxyphenyl)-5,6a-dihydroisochromeno[3,4-*b*]chromene (3g).** The compound was prepared from **1a** (0.143 g, 0.6 mmol) and **2g** (0.092 g, 0.3 mmol) following typical procedure: 0.087 g (81% yield) of product was obtained after column chromatography (eluent = petroleum ether/ ethyl acetate 25:1 v/v) as white solid, mp 174.0-176.2 °C; <sup>1</sup>H NMR (400 MHz, CDCl<sub>3</sub>, 25 °C) δ 7.84 (d, *J* = 7.8 Hz, 1H), 7.35-7.42 (m, 3H), 7.27 (t, *J* = 7.5 Hz, 1H), 7.10 (s, 1H), 7.03 (d, *J* = 7.5 Hz, 1H), 6.85-6.88 (m, 2H), 6.75-6.80 (m, 3H), 4.94 (d, *J* = 14.8 Hz, 1H), 4.59 (d, *J* = 14.8 Hz, 1H), 3.71 (s, 3H); <sup>13</sup>C NMR (100.6 MHz, CDCl<sub>3</sub>, 25 °C) δ 160.1, 157.7 (*J*<sub>CF</sub> = 238.4 Hz), 147.5 (*J*<sub>CF</sub> = 2.1 Hz), 134.0, 130.5, 130.3, 128.7, 128.3, 128.2, 127.8, 124.6, 123.5 (*J*<sub>CF</sub> = 8.7 Hz), 123.3, 118.2 (*J*<sub>CF</sub> = 2.3 Hz), 117.4 (*J*<sub>CF</sub> = 8.2 Hz), 115.7 (*J*<sub>CF</sub> = 23.6 Hz), 113.6, 112.9 (*J*<sub>CF</sub> = 23.9 Hz), 102.1, 65.0, 55.2; HRMS (ESI, TOF) calcd for C<sub>23</sub>H<sub>18</sub>FO<sub>3</sub> [M+H]<sup>+</sup> 361.1240, found 361.1242.

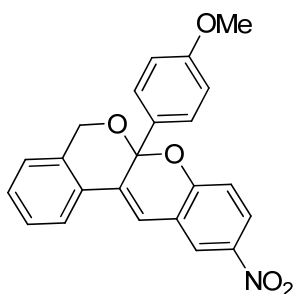

**6a-(4-methoxyphenyl)-10-nitro-5,6a-dihydroisochromeno[3,4-*b*]chromene (3h).** The compound was prepared from **1a** (0.143 g, 0.6 mmol) and **2h** (0.101 g, 0.3 mmol) following typical procedure: 0.047 g (41% yield) of product was obtained after column chromatography (eluent = petroleum ether/ ethyl acetate 20:1 v/v) as bright yellow solid, mp 207.9-209.7 °C; <sup>1</sup>H NMR (400 MHz, CDCl<sub>3</sub>, 25 °C) δ 8.11 (d, *J* = 2.6 Hz, 1H), 8.01 (dd, *J*<sub>1</sub> = 2.6 Hz, *J*<sub>2</sub> = 8.9 Hz, 1H), 7.87 (d, *J* = 7.8 Hz, 1H), 7.38-7.42 (m, 3H), 7.29-7.33

(m, 1H), 7.20 (s, 1H), 7.04 (d,  $J = 7.6$  Hz, 1H), 6.99 (d,  $J = 9.0$  Hz, 1H), 6.78 (d,  $J = 8.9$  Hz, 2H), 4.98 (d,  $J = 15.0$  Hz, 1H), 4.64 (d,  $J = 14.9$  Hz, 1H), 3.72 (s, 3H);  $^{13}\text{C}$  NMR (100.6 MHz,  $\text{CDCl}_3$ , 25 °C)  $\delta$  160.4, 156.4, 142.4, 133.9, 129.9, 129.6, 129.4, 128.9, 128.1, 128.0, 125.1, 124.6, 123.5, 122.6, 122.5, 117.1, 116.9, 113.9, 102.8, 65.2, 55.3; HRMS (ESI, TOF) calcd for  $\text{C}_{23}\text{H}_{18}\text{NO}_5$   $[\text{M}+\text{H}]^+$  388.1185, found 388.1185.

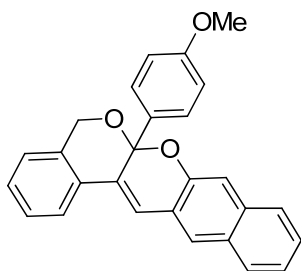

**6a-(4-methoxyphenyl)-5,6a-dihydrobenzo[g]isochromeno[3,4-*b*]chromene (3i).** The compound was prepared from **1a** (0.143 g, 0.6 mmol) and **2i** (0.102 g, 0.3 mmol) following typical procedure: 0.061 g (52% yield) of product was obtained after column chromatography (eluent = petroleum ether/ ethyl acetate 50:1 v/v) as bright yellow solid, mp 190.3-192.7 °C;  $^1\text{H}$  NMR (400 MHz,  $\text{CDCl}_3$ , 25 °C)  $\delta$  8.12 (d,  $J = 8.4$  Hz, 1H), 7.99 (d,  $J = 7.7$  Hz, 1H), 7.78 (s, 1H), 7.73 (d,  $J = 8.1$  Hz, 1H), 7.65 (d,  $J = 8.8$  Hz, 1H), 7.53-7.55 (m, 1H), 7.34-7.45 (m, 4H), 7.28-7.30 (m, 1H), 7.22 (d,  $J = 8.8$  Hz, 1H), 7.09 (d,  $J = 7.4$  Hz, 1H), 6.72 (d,  $J = 8.9$  Hz, 2H), 4.98 (d,  $J = 14.4$  Hz, 1H), 4.68 (d,  $J = 14.4$  Hz, 1H), 3.67 (s, 3H);  $^{13}\text{C}$  NMR (100.6 MHz,  $\text{CDCl}_3$ , 25 °C)  $\delta$  160.0, 149.9, 133.9, 131.8, 131.2, 130.1, 129.6, 128.8, 128.0, 127.9, 127.7, 126.9, 126.0, 124.6, 124.1, 123.4, 121.7, 117.9, 115.8, 115.6, 113.5, 102.5, 65.1, 55.2; HRMS (ESI, TOF) calcd for  $\text{C}_{27}\text{H}_{21}\text{O}_3$   $[\text{M}+\text{H}]^+$  393.1491, found 393.1490.

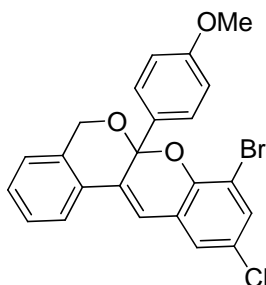

**8-bromo-10-chloro-6a-(4-methoxyphenyl)-5,6a-dihydroisochromeno[3,4-*b*]chromene (3j).** The compound was prepared from **1a** (0.143 g, 0.6 mmol) and **2j** (0.121 g, 0.3 mmol)

following typical procedure: 0.061 g (45% yield) of product was obtained after column chromatography (eluent = petroleum ether/ ethyl acetate 100:1 v/v) as white solid, mp 139.7-141.8 °C;  $^1\text{H}$  NMR (400 MHz,  $\text{CDCl}_3$ , 25 °C)  $\delta$  7.83 (d,  $J = 6.2$  Hz, 1H), 7.29-7.45 (m, 5H), 7.03-7.07 (m, 3H), 6.76 (d,  $J = 6.2$  Hz, 2H), 4.95 (d,  $J = 14.4$  Hz, 1H), 4.59 (d,  $J = 13.8$  Hz, 1H), 3.72 (s, 3H);  $^{13}\text{C}$  NMR (100.6 MHz,  $\text{CDCl}_3$ , 25 °C)  $\delta$  160.3, 147.3, 134.2, 131.8, 130.3, 130.0, 129.9, 128.7, 128.2, 128.0, 127.0, 125.6, 125.1, 124.7, 123.4, 117.6, 113.6, 111.0, 103.3, 65.1, 55.3; HRMS (ESI, TOF) calcd for  $\text{C}_{23}\text{H}_{17}\text{BrClO}_3$   $[\text{M}+\text{H}]^+$  455.0050, found 455.0059.

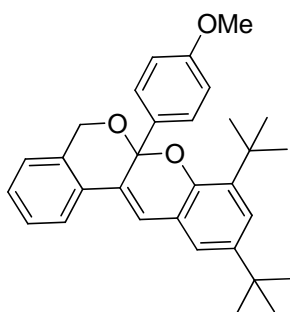

**8,10-di-tert-butyl-6a-(4-methoxyphenyl)-5,6a-dihydroisochromeno[3,4-b]chromene (3k).** The compound was prepared from **1a** (0.143 g, 0.6 mmol) and **2k** (0.121 g, 0.3 mmol) following typical procedure: 0.048 g (35% yield) of product was obtained after column chromatography (eluent = petroleum ether/ ethyl acetate 100:1 v/v) as white solid, mp 260.6-262.4 °C;  $^1\text{H}$  NMR (400 MHz,  $\text{CDCl}_3$ , 25 °C)  $\delta$  7.82 (d,  $J = 7.8$  Hz, 1H), 7.48 (d,  $J = 8.8$  Hz, 2H), 7.29 (t,  $J = 7.5$  Hz, 1H), 7.21 (s, 1H), 7.14-7.20 (m, 2H), 7.05-7.06 (m, 1H), 6.94 (d,  $J = 7.6$  Hz, 1H), 6.76 (d,  $J = 8.8$  Hz, 2H), 4.97 (d,  $J = 15.2$  Hz, 1H), 4.67 (d,  $J = 15.2$  Hz, 1H), 3.71 (s, 3H), 1.33 (s, 9H), 1.28 (s, 9H);  $^{13}\text{C}$  NMR (100.6 MHz,  $\text{CDCl}_3$ , 25 °C)  $\delta$  159.9, 147.5, 143.2, 136.2, 133.5, 130.6, 129.9, 128.9, 127.5, 127.4, 124.8, 124.5, 124.3, 123.2, 122.3, 121.4, 120.0, 113.5, 102.1, 65.1, 55.2, 34.8, 34.3, 31.6, 30.1; HRMS (ESI, TOF) calcd for  $\text{C}_{31}\text{H}_{35}\text{O}_3$   $[\text{M}+\text{H}]^+$  455.2586, found 455.2584.



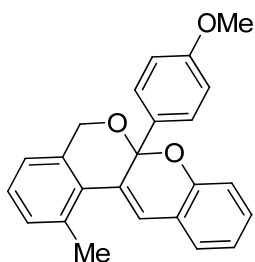

**6a-(4-methoxyphenyl)-1-methyl-5,6a-dihydroisochromeno[3,4-*b*]chromene (3l).** The compound was prepared from corresponding internal alkynol **1** (0.151 g, 0.6 mmol) and **2a** (0.087 g, 0.3 mmol) following typical procedure: 0.071 g (66% yield) of product was obtained after column chromatography (eluent = petroleum ether/ ethyl acetate 100:1 v/v) as white solid, mp 113.2-115.5 °C; <sup>1</sup>H NMR (400 MHz, CDCl<sub>3</sub>, 25 °C) δ 7.29-7.31 (m, 3H), 7.18-7.23 (m, 2H), 7.15 (d, *J* = 7.1 Hz, 1H), 7.07-7.09 (m, 2H), 6.92 (t, *J* = 7.4 Hz, 1H), 6.83 (s, 1H), 6.71 (d, *J* = 8.8 Hz, 2H), 4.98 (d, *J* = 12.8 Hz, 1H), 4.72 (d, *J* = 12.8 Hz, 1H), 3.69 (s, 3H), 2.64 (s, 3H); <sup>13</sup>C NMR (100.6 MHz, CDCl<sub>3</sub>, 25 °C) δ 159.6, 151.8, 136.7, 134.5, 134.0, 132.6, 130.8, 130.1, 127.9, 127.4, 127.1, 126.8, 124.3, 122.4, 122.3, 121.7, 116.4, 113.4, 103.1, 65.8, 55.2, 20.2; HRMS (ESI, TOF) calcd for C<sub>24</sub>H<sub>21</sub>O<sub>3</sub> [M+H]<sup>+</sup> 357.1491, found 357.1477.

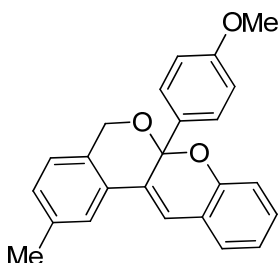

**6a-(4-methoxyphenyl)-2-methyl-5,6a-dihydroisochromeno[3,4-*b*]chromene (3m).** The compound was prepared from corresponding internal alkynol **1** (0.151 g, 0.6 mmol) and **2a** (0.087 g, 0.3 mmol) following typical procedure: 0.064 g (60% yield) of product was obtained after column chromatography (eluent = petroleum ether/ ethyl acetate 100:1 v/v) as white solid, mp 144.2-146.4; <sup>1</sup>H NMR (400 MHz, CDCl<sub>3</sub>, 25 °C) δ 7.65 (s, 1H), 7.42 (d, *J* = 8.8 Hz, 2H), 7.06-7.17 (m, 4H), 6.87-6.93 (m, 3H), 6.75 (d, *J* = 8.8 Hz, 2H), 4.91 (d, *J* = 14.6 Hz, 1H), 4.57 (d, *J* = 14.6 Hz, 1H), 3.71 (s, 3H), 2.42 (s, 3H); <sup>13</sup>C NMR (100.6 MHz, CDCl<sub>3</sub>, 25 °C) δ 160.0, 151.5, 137.3, 131.1, 131.0, 130.9, 129.4, 128.9, 128.2, 127.5, 127.0, 124.4, 123.6, 122.6, 121.8, 118.8, 116.5, 113.5, 102.0, 64.9, 55.2,

21.5; HRMS (ESI, TOF) calcd for C<sub>24</sub>H<sub>21</sub>O<sub>3</sub> [M+H]<sup>+</sup> 357.1491, found 357.1491.

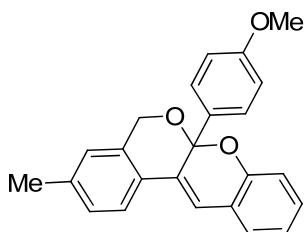

**6a-(4-methoxyphenyl)-3-methyl-5,6a-dihydroisochromeno[3,4-*b*]chromene (3n).** The compound was prepared from corresponding internal alkynol **1** (0.151 g, 0.6 mmol) and **2a** (0.087 g, 0.3 mmol) following typical procedure: 0.065 g (61% yield) of product was obtained after column chromatography (eluent = petroleum ether/ ethyl acetate 100:1 v/v) as white solid, mp 138.4-140.1 °C; <sup>1</sup>H NMR (400 MHz, CDCl<sub>3</sub>, 25 °C) δ 7.74 (d, *J* = 8.0 Hz, 1H), 7.43 (d, *J* = 8.8 Hz, 2H), 7.06-7.17 (m, 4H), 6.86-6.92 (m, 2H), 6.82 (s, 1H), 6.75 (d, *J* = 8.8 Hz, 2H), 4.89 (d, *J* = 14.8 Hz, 1H), 4.55 (d, *J* = 14.8 Hz, 1H), 3.71 (s, 3H), 2.33 (s, 3H); <sup>13</sup>C NMR (100.6 MHz, CDCl<sub>3</sub>, 25 °C) δ 160.0, 151.4, 138.0, 133.7, 130.7, 129.2, 128.6, 128.3, 128.1, 127.3, 126.8, 125.0, 123.1, 122.7, 121.8, 117.9, 116.4, 113.5, 102.0, 65.0, 55.2, 21.4; HRMS (ESI, TOF) calcd for C<sub>24</sub>H<sub>21</sub>O<sub>3</sub> [M+H]<sup>+</sup> 357.1491, found 357.1485.

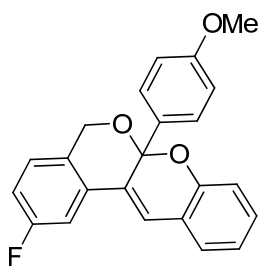

**2-fluoro-6a-(4-methoxyphenyl)-5,6a-dihydroisochromeno[3,4-*b*]chromene (3o).** The compound was prepared from corresponding internal alkynol **1** (0.154 g, 0.6 mmol) and **2a** (0.087 g, 0.3 mmol) following typical procedure: 0.098 g (91% yield) of product was obtained after column chromatography (eluent = petroleum ether/ ethyl acetate 100:1 v/v) as white solid, mp 118.2-120.5 °C; <sup>1</sup>H NMR (400 MHz, CDCl<sub>3</sub>, 25 °C) δ 7.51 (dd, *J*<sub>1</sub> = 2.2 Hz, *J*<sub>2</sub> = 9.7 Hz, 1H), 7.41 (d, *J* = 8.9 Hz, 2H), 7.10-7.18 (m, 3H), 6.88-7.01 (m, 4H), 6.76 (d, *J* = 8.8 Hz, 2H), 4.90 (d, *J* = 14.6 Hz, 1H), 4.56 (d, *J* = 14.6 Hz, 1H), 3.71 (s, 3H);

$^{13}\text{C}$  NMR (100.6 MHz,  $\text{CDCl}_3$ , 25 °C)  $\delta$  162 ( $J_{\text{CF}} = 245.1$  Hz), 160.1, 151.6, 133.1, 133.0 ( $J_{\text{CF}} = 7.8$  Hz), 130.5, 129.9, 129.6 ( $J_{\text{CF}} = 2.8$  Hz), 128.1, 127.2, 126.4 ( $J_{\text{CF}} = 2.5$  Hz), 126.3 ( $J_{\text{CF}} = 8.6$  Hz), 122.1, 122.0, 120.2, 116.5, 115.1 ( $J_{\text{CF}} = 22.4$  Hz), 114.1, 113.6, 109.6 ( $J_{\text{CF}} = 22.7$  Hz), 101.7, 64.5, 55.2; HRMS (ESI, TOF) calcd for  $\text{C}_{23}\text{H}_{18}\text{O}_3\text{F}$   $[\text{M}+\text{H}]^+$  361.1240, found 361.1249.

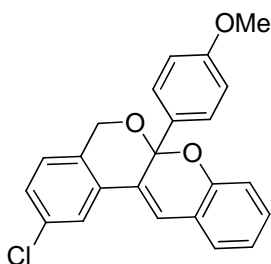

**2-chloro-6a-(4-methoxyphenyl)-5,6a-dihydroisochromeno[3,4-*b*]chromene (3p).** The compound was prepared from corresponding internal alkynol **1** (0.162 g, 0.6 mmol) and **2a** (0.087 g, 0.3 mmol) following typical procedure: 0.059 g (52% yield) of product was obtained after column chromatography (eluent = petroleum ether/ ethyl acetate 25:1 v/v) as white solid, mp 133.8-135.9 °C;  $^1\text{H}$  NMR (400 MHz,  $\text{CDCl}_3$ , 25 °C)  $\delta$  7.81-7.82 (m, 1H), 7.40 (d,  $J = 8.8$  Hz, 2H), 7.10-7.21 (m, 4H), 6.88-6.96 (m, 3H), 6.76 (d,  $J = 8.8$  Hz, 2H), 4.89 (d,  $J = 14.9$  Hz, 1H), 4.55 (d,  $J = 14.9$  Hz, 1H), 3.71 (s, 3H);  $^{13}\text{C}$  NMR (100.6 MHz,  $\text{CDCl}_3$ , 25 °C)  $\delta$  160.1, 151.6, 133.6, 132.8, 132.2, 130.4, 129.9, 128.1, 127.9, 127.3, 126.0, 123.2, 122.1, 122.0, 120.2, 116.5, 113.7, 101.7, 64.5, 55.2; HRMS (ESI, TOF) calcd for  $\text{C}_{23}\text{H}_{18}\text{O}_3\text{Cl}$   $[\text{M}+\text{H}]^+$  377.0944, found 377.0944.

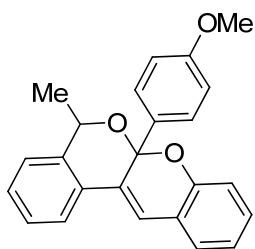

**6a-(4-methoxyphenyl)-5-methyl-5,6a-dihydroisochromeno[3,4-*b*]chromene (3q).** The compound was prepared from corresponding internal alkynol **1** (0.150 g, 0.6 mmol) and **2a** (0.087 g, 0.3 mmol) following typical procedure: 0.074 g (69% yield) of product was obtained after column chromatography (eluent = petroleum ether/ ethyl acetate 50:1 v/v)

as white solid, mp 150.1-152.3 °C;  $^1\text{H}$  NMR (400 MHz,  $\text{CDCl}_3$ , 25 °C)  $\delta$  7.87 (d,  $J = 7.8$  Hz, 1H), 7.44 (d,  $J = 8.8$  Hz, 2H), 7.30-7.35 (m, 1H), 7.25-7.26 (m, 1H), 7.23 (s, 1H), 7.15-7.17 (m, 1H), 7.03-7.07 (m, 2H), 6.87-6.89 (m, 2H), 6.75 (d,  $J = 8.8$  Hz, 2H), 4.66 (q,  $J = 6.5$  Hz, 1H), 3.70 (s, 3H), 1.66 (d,  $J = 6.5$  Hz, 3H);  $^{13}\text{C}$  NMR (100.6 MHz,  $\text{CDCl}_3$ , 25 °C)  $\delta$  160.0, 151.4, 138.1, 130.6, 130.0, 129.3, 128.4, 128.2, 127.4, 127.4, 127.1, 126.9, 124.7, 123.1, 122.4, 121.8, 117.7, 116.5, 113.6, 101.2, 55.2, 21.4; HRMS (ESI, TOF) calcd for  $\text{C}_{24}\text{H}_{21}\text{O}_3$   $[\text{M}+\text{H}]^+$  357.1491, found 357.1491.

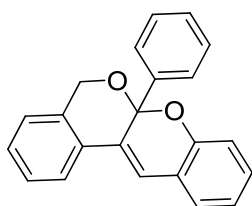

**6a-phenyl-5,6a-dihydroisochromeno[3,4-b]chromene (3r).** To a mixture of corresponding internal alkynol **1** (0.6 mmol) and salicyl *N*-tosylhydrazone **2a** (0.3 mmol) in a mixture solvent (toluene:dioxane= 1:4, v/v, 2 ml) was added the copper(II) perchlorate (0.09 mmol, 30 mol%) under Ar. The reaction mixture was stirred at 80 °C for 20 hours. 0.048 g (51% yield) of product **3r** was obtained after column chromatography (eluent = petroleum ether/ ethyl acetate 50:1 v/v) as white solid, mp 109.8-112.1 °C;  $^1\text{H}$  NMR (400 MHz,  $\text{CDCl}_3$ , 25 °C)  $\delta$  7.84 (d,  $J = 7.8$  Hz, 1H), 7.48-7.51 (m, 2H), 7.36 (t,  $J = 7.5$  Hz, 1H), 7.22-7.27 (m, 4H), 7.09-7.17 (m, 3H), 7.03 (d,  $J = 7.5$  Hz, 1H), 6.95 (d,  $J = 8.0$  Hz, 1H), 6.89 (t,  $J = 7.4$  Hz, 1H), 4.96 (d,  $J = 14.6$  Hz, 1H), 4.62 (d,  $J = 14.6$  Hz, 1H);  $^{13}\text{C}$  NMR (100.6 MHz,  $\text{CDCl}_3$ , 25 °C)  $\delta$  151.5, 139.0, 133.9, 131.3, 129.5, 129.0, 128.2, 127.9, 127.8, 127.2, 127.1, 126.7, 124.5, 123.3, 122.4, 121.9, 119.5, 116.5, 102.0, 65.1; HRMS (ESI, TOF) calcd for  $\text{C}_{22}\text{H}_{17}\text{O}_2$   $[\text{M}+\text{H}]^+$  313.1229, found 313.1231.

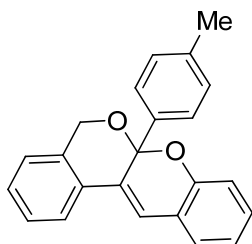

**6a-(*p*-tolyl)-5,6a-dihydroisochromeno[3,4-*b*]chromene (3s).** The compound was prepared from corresponding internal alkynol **1** (0.133 g, 0.6 mmol) and **2a** (0.087 g, 0.3 mmol) following typical procedure: 0.071 g (73% yield) of product was obtained after column chromatography (eluent = petroleum ether/ ethyl acetate 100:1 v/v) as white solid, mp 113.4-115.7 °C; <sup>1</sup>H NMR (400 MHz, CDCl<sub>3</sub>, 25 °C) δ 7.85 (d, *J* = 7.8 Hz, 1H), 7.34-7.39 (m, 3H), 7.23-7.25 (m, 1H), 7.09-7.17 (m, 3H), 7.01-7.05 (m, 3H), 6.94 (d, *J* = 8.0 Hz, 1H), 6.89 (t, *J* = 7.4 Hz, 1H), 4.95 (d, *J* = 14.7 Hz, 1H), 4.62 (d, *J* = 14.7 Hz, 1H), 2.24 (s, 3H); <sup>13</sup>C NMR (100.6 MHz, CDCl<sub>3</sub>, 25 °C) δ 151.5, 138.9, 135.9, 133.9, 131.2, 129.5, 129.0, 127.9, 127.8, 127.3, 127.0, 126.7, 124.5, 123.3, 122.5, 121.9, 119.2, 116.5, 102.0, 65.0, 21.2; HRMS (ESI, TOF) calcd for C<sub>23</sub>H<sub>19</sub>O<sub>2</sub> [M+H]<sup>+</sup> 327.1385, found 327.1379.

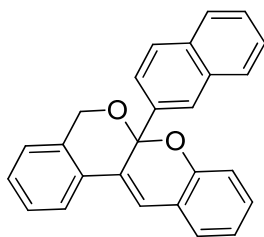

**6a-(naphthalen-2-yl)-5,6a-dihydroisochromeno[3,4-*b*]chromene (3t).** The compound was prepared from corresponding internal alkynol **1** (0.155 g, 0.6 mmol) and **2a** (0.087 g, 0.3 mmol) following typical procedure: 0.048 g (44% yield) of product was obtained after column chromatography (eluent = petroleum ether/ ethyl acetate 50:1 v/v) as white solid, mp 163.6-166.0 °C; <sup>1</sup>H NMR (400 MHz, CDCl<sub>3</sub>, 25 °C) δ 7.94 (d, *J* = 7.8 Hz, 1H), 7.74-7.81 (m, 4H), 7.67 (d, *J* = 7.6 Hz, 1H), 7.36-7.44 (m, 3H), 7.23-7.26 (m, 2H), 7.18 (dd, *J*<sub>1</sub> = 1.4 Hz, *J*<sub>2</sub> = 7.5 Hz, 1H), 7.05-7.10 (m, 1H), 7.00 (d, *J* = 7.5 Hz, 1H), 6.94 (d, *J* = 8.0 Hz, 1H), 6.85-6.89 (m, 1H), 4.98 (d, *J* = 14.8 Hz, 1H), 4.61 (d, *J* = 14.8 Hz, 1H); <sup>13</sup>C NMR (100.6 MHz, CDCl<sub>3</sub>, 25 °C) δ 151.5, 135.9, 133.8, 133.6, 132.5, 131.0, 129.6, 128.6, 128.6, 128.0, 127.8, 127.6, 127.1, 126.9, 126.7, 126.1, 124.6, 124.0, 123.3, 122.5, 122.0, 119.5, 116.5, 102.2, 65.1; HRMS (ESI, TOF) calcd for C<sub>26</sub>H<sub>19</sub>O<sub>2</sub> [M+H]<sup>+</sup> 363.1385, found 363.1371.

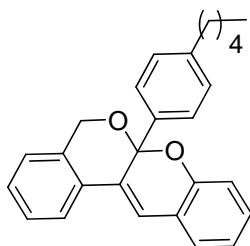

**6a-(4-pentylphenyl)-5,6a-dihydroisochromeno[3,4-*b*]chromene (3u).** The compound was prepared from corresponding internal alkynol **1** (0.167 g, 0.6 mmol) and **2a** (0.087 g, 0.3 mmol) following typical procedure: 0.051 g (45% yield) of product was obtained after column chromatography (eluent = petroleum ether/ ethyl acetate 100:1 v/v) as white solid, mp 77.3-79.6 °C; <sup>1</sup>H NMR (400 MHz, CDCl<sub>3</sub>, 25 °C) δ 7.84 (d, *J* = 7.8 Hz, 1H), 7.33-7.40 (m, 3H), 7.24 (t, *J* = 6.9 Hz, 1H), 7.08-7.16 (m, 3H), 7.01-7.04 (m, 3H), 6.94 (d, *J* = 8.0 Hz, 1H), 6.88 (t, *J* = 7.4 Hz, 1H), 4.94 (d, *J* = 14.7 Hz, 1H), 4.62 (d, *J* = 14.6 Hz, 1H), 2.48 (t, *J* = 7.6 Hz, 2H), 1.48-1.56 (m, 2H), 1.25-1.26 (m, 4H), 0.84 (t, *J* = 6.6 Hz, 3H); <sup>13</sup>C NMR (100.6 MHz, CDCl<sub>3</sub>, 25 °C) δ 151.6, 143.9, 136.2, 134.0, 131.4, 129.5, 128.3, 127.8, 127.8, 127.3, 127.1, 126.6, 124.5, 123.3, 122.5, 121.8, 119.4, 116.5, 102.1, 65.1, 35.7, 31.6, 30.9, 22.6, 14.1; HRMS (ESI, TOF) calcd for C<sub>27</sub>H<sub>27</sub>O<sub>2</sub> [M+H]<sup>+</sup> 383.2011, found 383.2003.

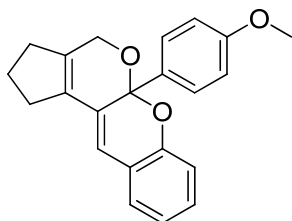

**5a-(4-methoxyphenyl)-2,3,4,5a-tetrahydro-1H-cyclopenta[4,5]pyrano[2,3-*b*]chromene (3v).** To a mixture of corresponding internal alkynol **1** (0.137g, 0.6 mmol) and salicyl *N*-tosylhydrazone **2a** (0.087g, 0.3 mmol) in toluene (2 ml) was added the copper(II) perchlorate (0.09 mmol, 30 mol%) under Ar. The reaction mixture was stirred at 80 °C for 4 hours. 0.036 g (36% yield) of product **3v** was obtained after column chromatography (eluent = petroleum ether/ ethyl acetate 100:1 v/v) as white solid, mp 207.6-209.5 °C; <sup>1</sup>H NMR (400 MHz, CDCl<sub>3</sub>, 25 °C) δ 7.42 (d, *J* = 8.6 Hz, 2H), 7.06 (d, *J* = 7.4 Hz, 1H), 7.00 (t, *J* = 7.6 Hz, 1H), 6.79-6.85 (m, 4H), 6.43 (s, 1H), 4.41 (d, *J* = 16.8 Hz, 1H), 4.00 (d, *J* = 16.8 Hz, 1H), 3.75 (s, 3H), 2.61-2.75 (m, 2H), 2.26-2.44 (m, 2H), 1.96-2.11 (m, 2H);

$^{13}\text{C}$  NMR (100.6 MHz,  $\text{CDCl}_3$ , 25  $^\circ\text{C}$ )  $\delta$  160.0, 151.6, 140.7, 132.8, 130.1, 128.5, 128.4, 127.3, 126.6, 123.1, 121.8, 116.8, 116.7, 113.5, 101.4, 64.4, 55.2, 33.3, 30.2, 22.8; HRMS (EI, TOF) calcd for  $\text{C}_{22}\text{H}_{20}\text{O}_3$   $[\text{M}]^+$  332.1412, found 332.1410.

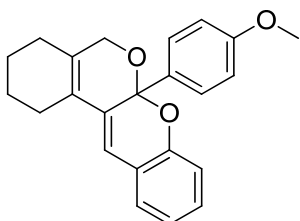

**6a-(4-methoxyphenyl)-1,2,3,4,5,6a-hexahydroisochromeno[3,4-*b*]chromene (3w).** To a mixture of corresponding internal alkynol **1** (0.145g, 0.6 mmol) and salicyl *N*-tosylhydrazone **2a** (0.087g, 0.3 mmol) in a mixture solvent (toluene:dioxane= 1:4, v/v, 2 ml) was added the copper(II) perchlorate (0.09 mmol, 30 mol%) under Ar. The reaction mixture was stirred at 80  $^\circ\text{C}$  for 8 hours. 0.043 g (41% yield) of product **3w** was obtained after column chromatography (eluent = petroleum ether/ ethyl acetate 100:1 v/v) as white solid, mp 182.2-183.8  $^\circ\text{C}$ ;  $^1\text{H}$  NMR (400 MHz,  $\text{CDCl}_3$ , 25  $^\circ\text{C}$ )  $\delta$  7.40 (d,  $J$  = 8.7 Hz, 2H), 7.06 (d,  $J$  = 7.4 Hz, 1H), 6.99 (t,  $J$  = 7.7 Hz, 1H), 6.78-6.84 (m, 4H), 6.55 (s, 1H), 4.16 (d,  $J$  = 16.6 Hz, 1H), 3.81 (d,  $J$  = 16.6 Hz, 1H), 3.75 (s, 3H), 2.52-2.56 (m, 1H), 2.22-2.26 (m, 1H), 1.92-1.98 (m, 1H), 1.64-1.84 (m, 4H), 1.50-1.53 (m, 1H);  $^{13}\text{C}$  NMR (100.6 MHz,  $\text{CDCl}_3$ , 25  $^\circ\text{C}$ )  $\delta$  160.0, 151.3, 134.5, 130.2, 128.9, 128.4, 126.6, 124.9, 123.2, 121.7, 116.4, 115.6, 113.5, 101.4, 66.4, 55.2, 25.9, 23.2, 22.4, 21.9; HRMS (EI, TOF) calcd for  $\text{C}_{23}\text{H}_{22}\text{O}_3$   $[\text{M}]^+$  346.1569, found 346.1567.

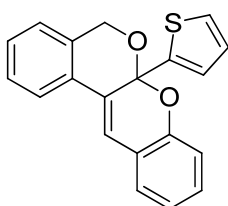

**6a-(thiophen-2-yl)-5,6a-dihydroisochromeno[3,4-*b*]chromene (3x).** The compound was prepared from corresponding internal alkynol **1** (0.128 g, 0.6 mmol) and **2a** (0.087 g, 0.3 mmol) following typical procedure: 0.072 g (75 % yield) of product was obtained after column chromatography (eluent = petroleum ether/ ethyl acetate 100:1 v/v) as white solid, mp 127.8-129.6  $^\circ\text{C}$ ;  $^1\text{H}$  NMR (400 MHz,  $\text{CDCl}_3$ , 25  $^\circ\text{C}$ )  $\delta$  7.82 (d,  $J$  = 7.8 Hz, 1H),

7.35 (t,  $J = 7.6$  Hz, 1H), 7.25-7.28 (m, 2H), 7.13-7.20 (m, 3H), 7.05 (d,  $J = 7.6$  Hz, 1H), 6.91-6.98 (m, 3H), 6.76 (t,  $J = 4.3$  Hz, 1H), 5.00 (d,  $J = 14.8$  Hz, 1H), 4.78 (d,  $J = 14.8$  Hz, 1H);  $^{13}\text{C}$  NMR (100.6 MHz,  $\text{CDCl}_3$ , 25 °C)  $\delta$  151.4, 143.0, 133.5, 130.2, 129.6, 128.1, 127.8, 127.6, 127.4, 127.3, 127.1, 126.1, 124.6, 123.3, 122.3, 122.2, 119.0, 116.6, 100.1, 65.3; HRMS (EI, TOF) calcd for  $\text{C}_{20}\text{H}_{14}\text{O}_2\text{S}$   $[\text{M}]^+$  318.0715, found 318.0716.



#### 4. Crystal data and structure refinement of product 3a.

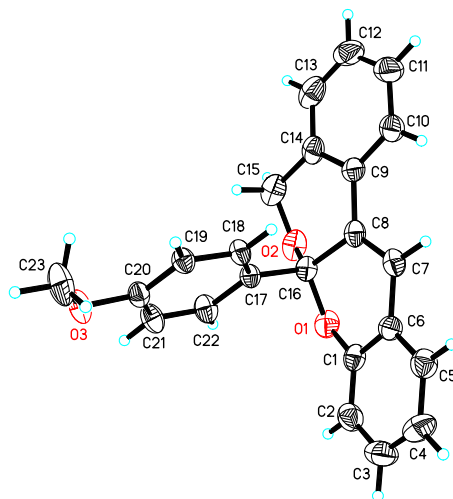

Table 1. Crystal data and structure refinement for **3a**.

|                                   |                                                                                                                       |
|-----------------------------------|-----------------------------------------------------------------------------------------------------------------------|
| Identification code               | <b>3a</b>                                                                                                             |
| Empirical formula                 | C <sub>23</sub> H <sub>18</sub> O <sub>3</sub>                                                                        |
| Formula weight                    | 342.37                                                                                                                |
| Temperature                       | 293(2) K                                                                                                              |
| Wavelength                        | 0.71073 Å                                                                                                             |
| Crystal system, space group       | Monoclinic, P2(1)/c                                                                                                   |
| Unit cell dimensions              | a = 25.754(2) Å    alpha = 90 deg.<br>b = 6.0366(5) Å    beta = 106.637(2) deg.<br>c = 23.164(2) Å    gamma = 90 deg. |
| Volume                            | 3450.5(5) Å <sup>3</sup>                                                                                              |
| Z, Calculated density             | 8, 1.318 Mg/m <sup>3</sup>                                                                                            |
| Absorption coefficient            | 0.087 mm <sup>-1</sup>                                                                                                |
| F(000)                            | 1440                                                                                                                  |
| Crystal size                      | 0.231 x 0.147 x 0.123 mm                                                                                              |
| Theta range for data collection   | 1.65 to 26.00 deg.                                                                                                    |
| Limiting indices                  | -31 ≤ h ≤ 30, -7 ≤ k ≤ 7, -21 ≤ l ≤ 28                                                                                |
| Reflections collected / unique    | 19832 / 6780 [R(int) = 0.0424]                                                                                        |
| Completeness to theta = 26.00     | 99.8 %                                                                                                                |
| Absorption correction             | Empirical                                                                                                             |
| Max. and min. transmission        | 1.00000 and 0.21493                                                                                                   |
| Refinement method                 | Full-matrix least-squares on F <sup>2</sup>                                                                           |
| Data / restraints / parameters    | 6780 / 13 / 471                                                                                                       |
| Goodness-of-fit on F <sup>2</sup> | 1.057                                                                                                                 |
| Final R indices [I > 2σ(I)]       | R1 = 0.0531, wR2 = 0.1464                                                                                             |
| R indices (all data)              | R1 = 0.0815, wR2 = 0.1589                                                                                             |
| Largest diff. peak and hole       | 0.437 and -0.193 e.Å <sup>-3</sup>                                                                                    |

Table 2. Bond lengths [Å] and angles [deg] for **3a**.

---

|              |          |
|--------------|----------|
| O(1)-C(1)    | 1.406(2) |
| O(1)-C(16)   | 1.428(2) |
| O(2)-C(16)   | 1.411(2) |
| O(2)-C(15)   | 1.411(3) |
| O(3)-C(20)   | 1.366(2) |
| O(3)-C(23)   | 1.401(3) |
| O(4)-C(24)   | 1.374(2) |
| O(4)-C(39)   | 1.426(2) |
| O(5)-C(39)   | 1.417(2) |
| O(5)-C(38)   | 1.421(2) |
| O(6)-C(43)   | 1.372(2) |
| O(6)-C(46)   | 1.400(3) |
| C(1)-C(2)    | 1.348(3) |
| C(1)-C(6)    | 1.386(3) |
| C(2)-C(3)    | 1.375(3) |
| C(2)-H(2)    | 0.9300   |
| C(3)-C(4)    | 1.376(4) |
| C(3)-H(3)    | 0.9300   |
| C(4)-C(5)    | 1.380(3) |
| C(4)-H(4)    | 0.9300   |
| C(5)-C(6)    | 1.382(3) |
| C(5)-H(5)    | 0.9300   |
| C(6)-C(7)    | 1.452(3) |
| C(7)-C(8)    | 1.321(3) |
| C(7)-H(7)    | 0.9300   |
| C(8)-C(9)    | 1.475(3) |
| C(8)-C(16)   | 1.517(3) |
| C(9)-C(10)   | 1.394(3) |
| C(9)-C(14)   | 1.397(3) |
| C(10)-C(11)  | 1.360(3) |
| C(10)-H(10)  | 0.9300   |
| C(11)-C(12)  | 1.359(4) |
| C(11)-H(11)  | 0.9300   |
| C(12)-C(13)  | 1.368(4) |
| C(12)-H(12)  | 0.9300   |
| C(13)-C(14)  | 1.394(3) |
| C(13)-H(13)  | 0.9300   |
| C(14)-C(15)  | 1.487(3) |
| C(15)-H(15A) | 0.9700   |
| C(15)-H(15B) | 0.9700   |
| C(16)-C(17)  | 1.521(2) |
| C(17)-C(18)  | 1.361(2) |
| C(17)-C(22)  | 1.390(3) |
| C(18)-C(19)  | 1.393(2) |

|              |          |
|--------------|----------|
| C(18)-H(18)  | 0.9300   |
| C(19)-C(20)  | 1.373(3) |
| C(19)-H(19)  | 0.9300   |
| C(20)-C(21)  | 1.386(3) |
| C(21)-C(22)  | 1.365(3) |
| C(21)-H(21)  | 0.9300   |
| C(22)-H(22)  | 0.9300   |
| C(23)-H(23A) | 0.9600   |
| C(23)-H(23B) | 0.9600   |
| C(23)-H(23C) | 0.9600   |
| C(24)-C(25)  | 1.374(3) |
| C(24)-C(29)  | 1.395(3) |
| C(25)-C(26)  | 1.374(3) |
| C(25)-H(25)  | 0.9300   |
| C(26)-C(27)  | 1.368(3) |
| C(26)-H(26)  | 0.9300   |
| C(27)-C(28)  | 1.389(3) |
| C(27)-H(27)  | 0.9300   |
| C(28)-C(29)  | 1.385(3) |
| C(28)-H(28)  | 0.9300   |
| C(29)-C(30)  | 1.452(3) |
| C(30)-C(31)  | 1.332(3) |
| C(30)-H(30)  | 0.9300   |
| C(31)-C(32)  | 1.470(3) |
| C(31)-C(39)  | 1.508(3) |
| C(32)-C(37)  | 1.393(3) |
| C(32)-C(33)  | 1.395(3) |
| C(33)-C(34)  | 1.374(3) |
| C(33)-H(33)  | 0.9300   |
| C(34)-C(35)  | 1.373(4) |
| C(34)-H(34)  | 0.9300   |
| C(35)-C(36)  | 1.371(3) |
| C(35)-H(35)  | 0.9300   |
| C(36)-C(37)  | 1.394(3) |
| C(36)-H(36)  | 0.9300   |
| C(37)-C(38)  | 1.494(3) |
| C(38)-H(38A) | 0.9700   |
| C(38)-H(38B) | 0.9700   |
| C(39)-C(40)  | 1.516(3) |
| C(40)-C(41)  | 1.371(3) |
| C(40)-C(45)  | 1.399(3) |
| C(41)-C(42)  | 1.393(3) |
| C(41)-H(41)  | 0.9300   |
| C(42)-C(43)  | 1.375(3) |
| C(42)-H(42)  | 0.9300   |
| C(43)-C(44)  | 1.372(3) |

|                   |            |
|-------------------|------------|
| C(44)-C(45)       | 1.363(3)   |
| C(44)-H(44)       | 0.9300     |
| C(45)-H(45)       | 0.9300     |
| C(46)-H(46A)      | 0.9600     |
| C(46)-H(46B)      | 0.9600     |
| C(46)-H(46C)      | 0.9600     |
|                   |            |
| C(1)-O(1)-C(16)   | 114.32(14) |
| C(16)-O(2)-C(15)  | 112.09(15) |
| C(20)-O(3)-C(23)  | 118.08(16) |
| C(24)-O(4)-C(39)  | 115.96(15) |
| C(39)-O(5)-C(38)  | 111.96(15) |
| C(43)-O(6)-C(46)  | 118.53(18) |
| C(2)-C(1)-C(6)    | 122.6(2)   |
| C(2)-C(1)-O(1)    | 119.42(19) |
| C(6)-C(1)-O(1)    | 117.79(18) |
| C(1)-C(2)-C(3)    | 119.1(2)   |
| C(1)-C(2)-H(2)    | 120.5      |
| C(3)-C(2)-H(2)    | 120.5      |
| C(2)-C(3)-C(4)    | 120.5(2)   |
| C(2)-C(3)-H(3)    | 119.7      |
| C(4)-C(3)-H(3)    | 119.7      |
| C(3)-C(4)-C(5)    | 119.5(2)   |
| C(3)-C(4)-H(4)    | 120.2      |
| C(5)-C(4)-H(4)    | 120.2      |
| C(4)-C(5)-C(6)    | 120.7(2)   |
| C(4)-C(5)-H(5)    | 119.6      |
| C(6)-C(5)-H(5)    | 119.6      |
| C(5)-C(6)-C(1)    | 117.55(19) |
| C(5)-C(6)-C(7)    | 123.21(19) |
| C(1)-C(6)-C(7)    | 119.20(18) |
| C(8)-C(7)-C(6)    | 120.23(19) |
| C(8)-C(7)-H(7)    | 119.9      |
| C(6)-C(7)-H(7)    | 119.9      |
| C(7)-C(8)-C(9)    | 126.18(19) |
| C(7)-C(8)-C(16)   | 117.62(18) |
| C(9)-C(8)-C(16)   | 116.12(17) |
| C(10)-C(9)-C(14)  | 118.17(19) |
| C(10)-C(9)-C(8)   | 123.37(19) |
| C(14)-C(9)-C(8)   | 118.46(19) |
| C(11)-C(10)-C(9)  | 121.3(2)   |
| C(11)-C(10)-H(10) | 119.3      |
| C(9)-C(10)-H(10)  | 119.3      |
| C(12)-C(11)-C(10) | 120.5(3)   |
| C(12)-C(11)-H(11) | 119.7      |
| C(10)-C(11)-H(11) | 119.7      |

|                     |            |
|---------------------|------------|
| C(11)-C(12)-C(13)   | 120.0(2)   |
| C(11)-C(12)-H(12)   | 120.0      |
| C(13)-C(12)-H(12)   | 120.0      |
| C(12)-C(13)-C(14)   | 120.8(2)   |
| C(12)-C(13)-H(13)   | 119.6      |
| C(14)-C(13)-H(13)   | 119.6      |
| C(13)-C(14)-C(9)    | 119.2(2)   |
| C(13)-C(14)-C(15)   | 120.6(2)   |
| C(9)-C(14)-C(15)    | 120.2(2)   |
| O(2)-C(15)-C(14)    | 112.06(18) |
| O(2)-C(15)-H(15A)   | 109.2      |
| C(14)-C(15)-H(15A)  | 109.2      |
| O(2)-C(15)-H(15B)   | 109.2      |
| C(14)-C(15)-H(15B)  | 109.2      |
| H(15A)-C(15)-H(15B) | 107.9      |
| O(2)-C(16)-O(1)     | 100.70(14) |
| O(2)-C(16)-C(8)     | 110.10(16) |
| O(1)-C(16)-C(8)     | 110.70(14) |
| O(2)-C(16)-C(17)    | 111.19(14) |
| O(1)-C(16)-C(17)    | 109.09(15) |
| C(8)-C(16)-C(17)    | 114.23(15) |
| C(18)-C(17)-C(22)   | 117.95(17) |
| C(18)-C(17)-C(16)   | 124.38(16) |
| C(22)-C(17)-C(16)   | 117.65(16) |
| C(17)-C(18)-C(19)   | 121.84(17) |
| C(17)-C(18)-H(18)   | 119.1      |
| C(19)-C(18)-H(18)   | 119.1      |
| C(20)-C(19)-C(18)   | 119.33(17) |
| C(20)-C(19)-H(19)   | 120.3      |
| C(18)-C(19)-H(19)   | 120.3      |
| O(3)-C(20)-C(19)    | 124.93(18) |
| O(3)-C(20)-C(21)    | 115.72(17) |
| C(19)-C(20)-C(21)   | 119.36(17) |
| C(22)-C(21)-C(20)   | 120.35(18) |
| C(22)-C(21)-H(21)   | 119.8      |
| C(20)-C(21)-H(21)   | 119.8      |
| C(21)-C(22)-C(17)   | 121.15(19) |
| C(21)-C(22)-H(22)   | 119.4      |
| C(17)-C(22)-H(22)   | 119.4      |
| O(3)-C(23)-H(23A)   | 109.5      |
| O(3)-C(23)-H(23B)   | 109.5      |
| H(23A)-C(23)-H(23B) | 109.5      |
| O(3)-C(23)-H(23C)   | 109.5      |
| H(23A)-C(23)-H(23C) | 109.5      |
| H(23B)-C(23)-H(23C) | 109.5      |
| O(4)-C(24)-C(25)    | 118.51(19) |

|                    |            |
|--------------------|------------|
| O(4)-C(24)-C(29)   | 119.95(18) |
| C(25)-C(24)-C(29)  | 121.4(2)   |
| C(26)-C(25)-C(24)  | 119.1(2)   |
| C(26)-C(25)-H(25)  | 120.5      |
| C(24)-C(25)-H(25)  | 120.5      |
| C(27)-C(26)-C(25)  | 121.1(2)   |
| C(27)-C(26)-H(26)  | 119.4      |
| C(25)-C(26)-H(26)  | 119.4      |
| C(26)-C(27)-C(28)  | 119.6(2)   |
| C(26)-C(27)-H(27)  | 120.2      |
| C(28)-C(27)-H(27)  | 120.2      |
| C(29)-C(28)-C(27)  | 120.6(2)   |
| C(29)-C(28)-H(28)  | 119.7      |
| C(27)-C(28)-H(28)  | 119.7      |
| C(28)-C(29)-C(24)  | 118.16(19) |
| C(28)-C(29)-C(30)  | 123.97(19) |
| C(24)-C(29)-C(30)  | 117.83(19) |
| C(31)-C(30)-C(29)  | 120.57(18) |
| C(31)-C(30)-H(30)  | 119.7      |
| C(29)-C(30)-H(30)  | 119.7      |
| C(30)-C(31)-C(32)  | 126.04(18) |
| C(30)-C(31)-C(39)  | 118.18(18) |
| C(32)-C(31)-C(39)  | 115.73(17) |
| C(37)-C(32)-C(33)  | 118.81(19) |
| C(37)-C(32)-C(31)  | 118.92(18) |
| C(33)-C(32)-C(31)  | 122.24(19) |
| C(34)-C(33)-C(32)  | 120.5(2)   |
| C(34)-C(33)-H(33)  | 119.8      |
| C(32)-C(33)-H(33)  | 119.8      |
| C(35)-C(34)-C(33)  | 120.4(2)   |
| C(35)-C(34)-H(34)  | 119.8      |
| C(33)-C(34)-H(34)  | 119.8      |
| C(36)-C(35)-C(34)  | 120.4(2)   |
| C(36)-C(35)-H(35)  | 119.8      |
| C(34)-C(35)-H(35)  | 119.8      |
| C(35)-C(36)-C(37)  | 120.0(2)   |
| C(35)-C(36)-H(36)  | 120.0      |
| C(37)-C(36)-H(36)  | 120.0      |
| C(32)-C(37)-C(36)  | 119.9(2)   |
| C(32)-C(37)-C(38)  | 120.23(19) |
| C(36)-C(37)-C(38)  | 119.8(2)   |
| O(5)-C(38)-C(37)   | 113.01(18) |
| O(5)-C(38)-H(38A)  | 109.0      |
| C(37)-C(38)-H(38A) | 109.0      |
| O(5)-C(38)-H(38B)  | 109.0      |
| C(37)-C(38)-H(38B) | 109.0      |

|                     |            |
|---------------------|------------|
| H(38A)-C(38)-H(38B) | 107.8      |
| O(5)-C(39)-O(4)     | 100.15(14) |
| O(5)-C(39)-C(31)    | 110.28(15) |
| O(4)-C(39)-C(31)    | 112.03(15) |
| O(5)-C(39)-C(40)    | 111.34(15) |
| O(4)-C(39)-C(40)    | 108.89(15) |
| C(31)-C(39)-C(40)   | 113.39(15) |
| C(41)-C(40)-C(45)   | 117.35(18) |
| C(41)-C(40)-C(39)   | 123.74(16) |
| C(45)-C(40)-C(39)   | 118.91(17) |
| C(40)-C(41)-C(42)   | 121.62(18) |
| C(40)-C(41)-H(41)   | 119.2      |
| C(42)-C(41)-H(41)   | 119.2      |
| C(43)-C(42)-C(41)   | 119.62(19) |
| C(43)-C(42)-H(42)   | 120.2      |
| C(41)-C(42)-H(42)   | 120.2      |
| C(44)-C(43)-O(6)    | 115.58(18) |
| C(44)-C(43)-C(42)   | 119.35(18) |
| O(6)-C(43)-C(42)    | 125.0(2)   |
| C(45)-C(44)-C(43)   | 120.83(18) |
| C(45)-C(44)-H(44)   | 119.6      |
| C(43)-C(44)-H(44)   | 119.6      |
| C(44)-C(45)-C(40)   | 121.2(2)   |
| C(44)-C(45)-H(45)   | 119.4      |
| C(40)-C(45)-H(45)   | 119.4      |
| O(6)-C(46)-H(46A)   | 109.5      |
| O(6)-C(46)-H(46B)   | 109.5      |
| H(46A)-C(46)-H(46B) | 109.5      |
| O(6)-C(46)-H(46C)   | 109.5      |
| H(46A)-C(46)-H(46C) | 109.5      |
| H(46B)-C(46)-H(46C) | 109.5      |

---

Symmetry transformations used to generate equivalent atoms:

## 5. Copies of $^1\text{H}$ and $^{13}\text{C}$ NMR spectra

$^1\text{H}$  NMR of 6a-(4-methoxyphenyl)-5,6a-dihydroisochromeno[3,4-*b*]chromene (**3a**).

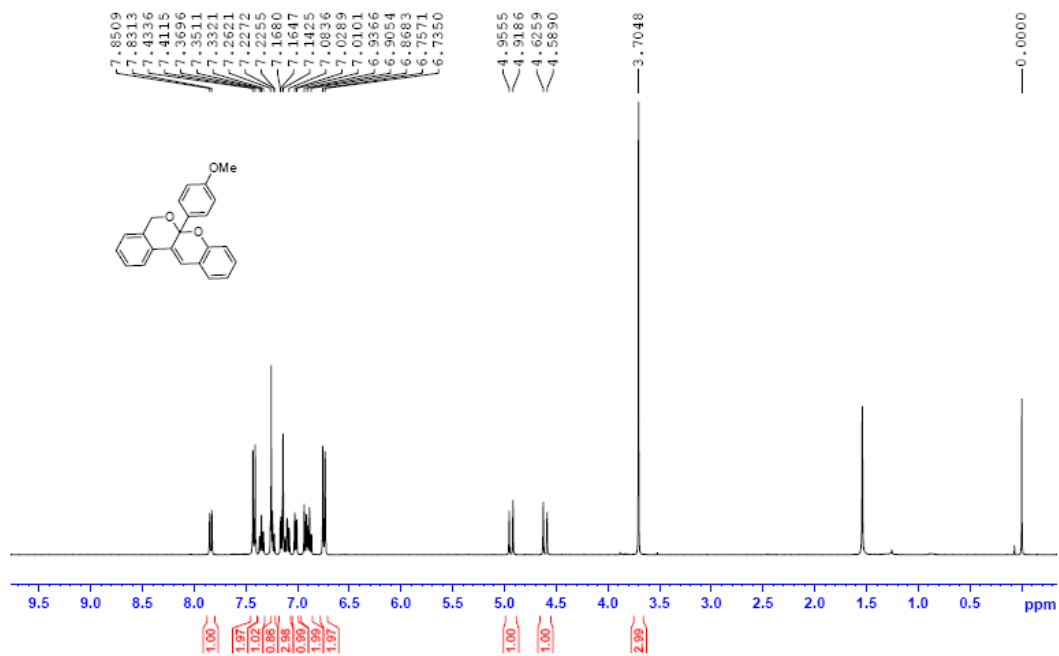

$^{13}\text{C}$  NMR of 6a-(4-methoxyphenyl)-5,6a-dihydroisochromeno[3,4-*b*]chromene (**3a**).

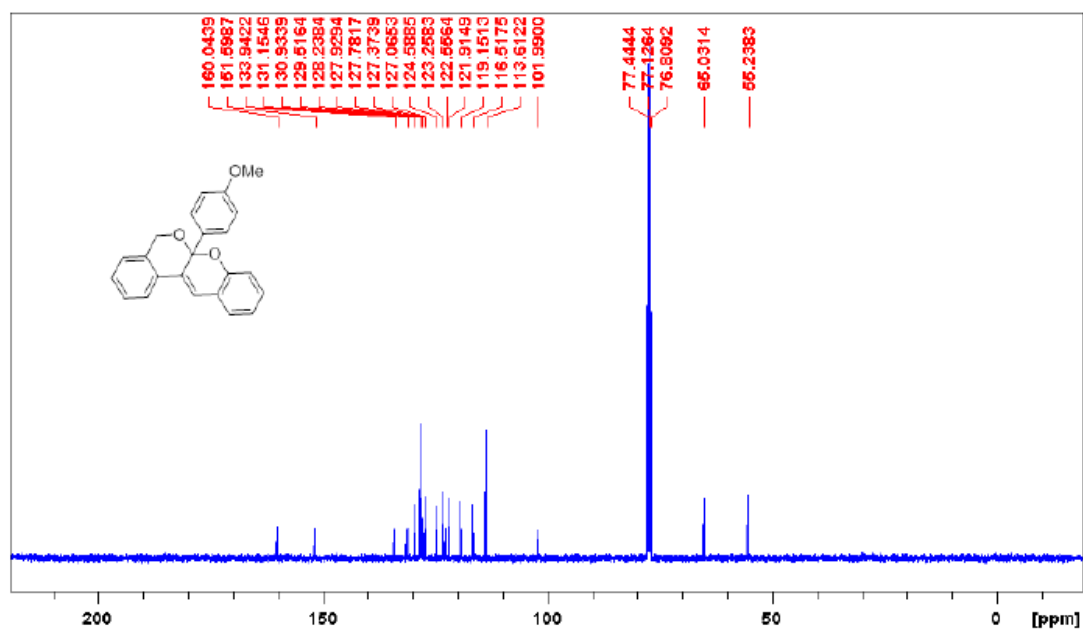



$^1\text{H}$  NMR of

8-methoxy-6a-(4-methoxyphenyl)-5,6a-dihydroisochromeno[3,4-*b*]chromene (**3b**).

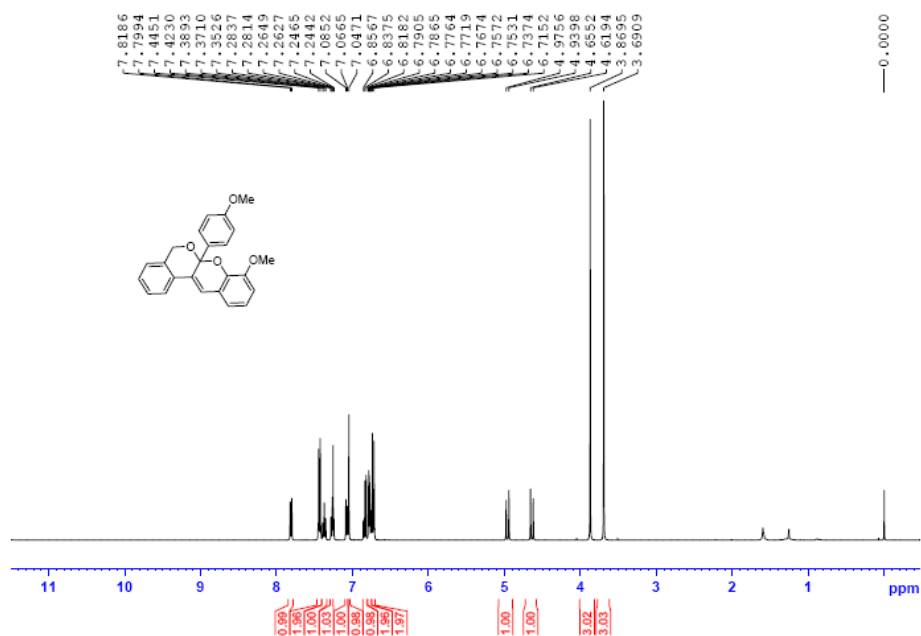

$^{13}\text{C}$  NMR of

8-methoxy-6a-(4-methoxyphenyl)-5,6a-dihydroisochromeno[3,4-*b*]chromene (**3b**).

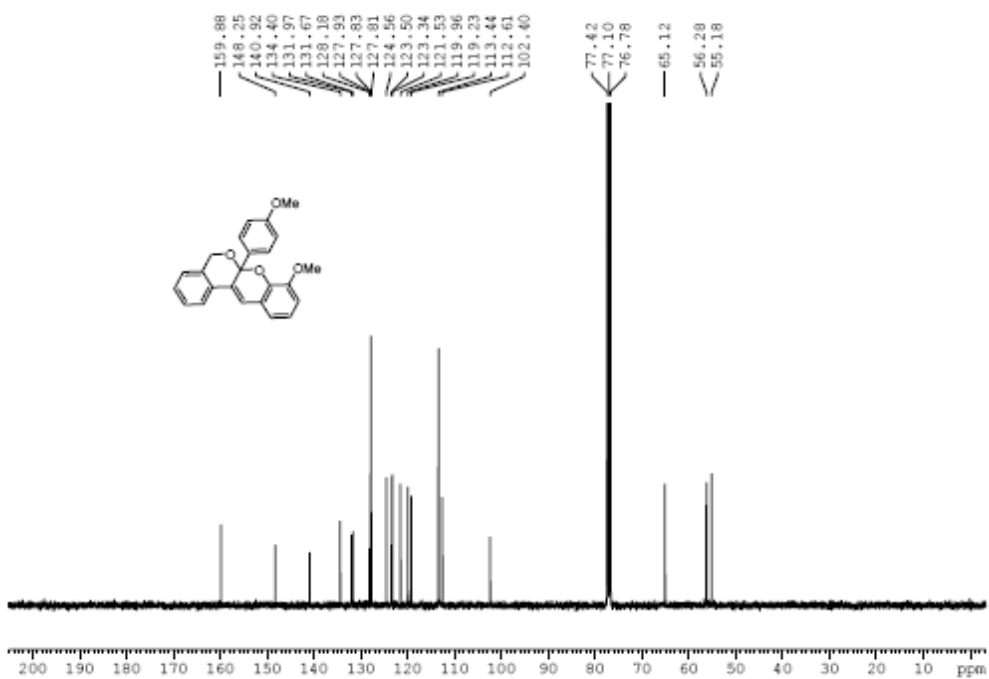

$^1\text{H}$  NMR of

9-methoxy-6a-(4-methoxyphenyl)-5,6a-dihydroisochromeno[3,4-*b*]chromene (**3c**).

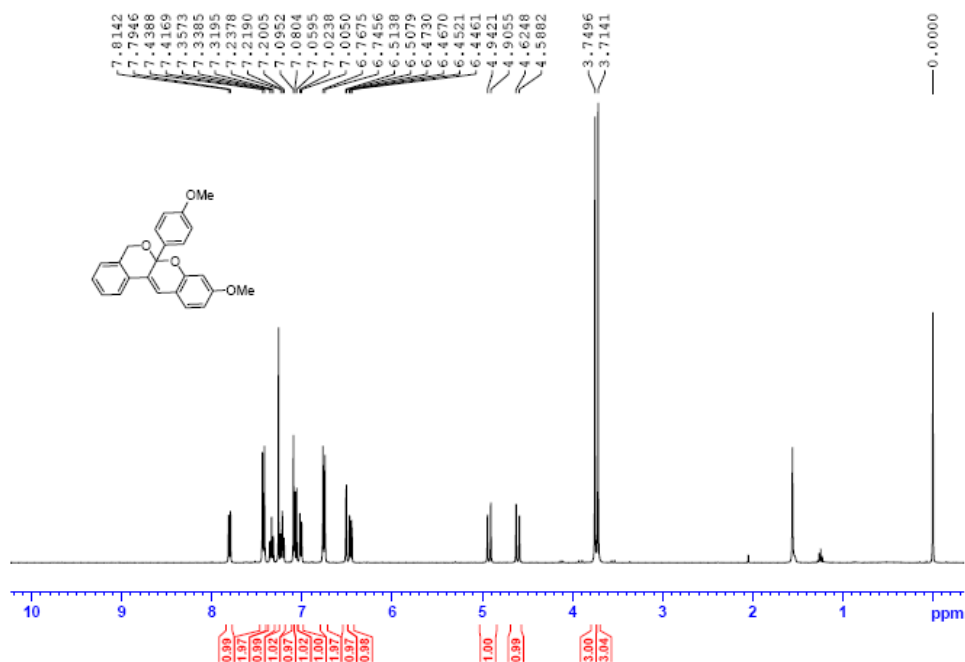

$^{13}\text{C}$  NMR of

9-methoxy-6a-(4-methoxyphenyl)-5,6a-dihydroisochromeno[3,4-*b*]chromene (**3c**).

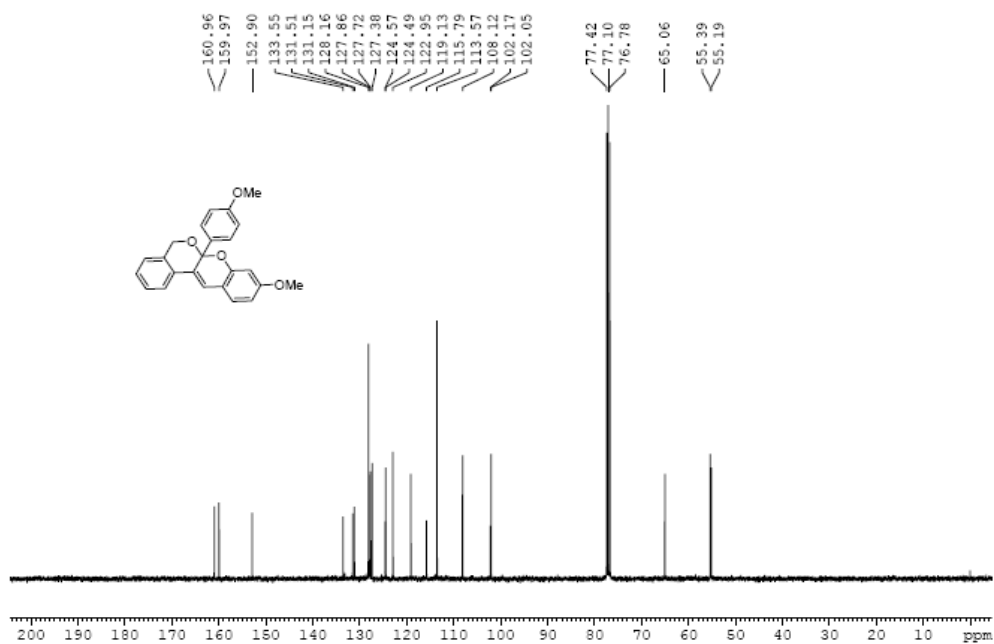

$^1\text{H}$  NMR of

10-methoxy-6a-(4-methoxyphenyl)-5,6a-dihydroisochromeno[3,4-*b*]chromene (**3d**).

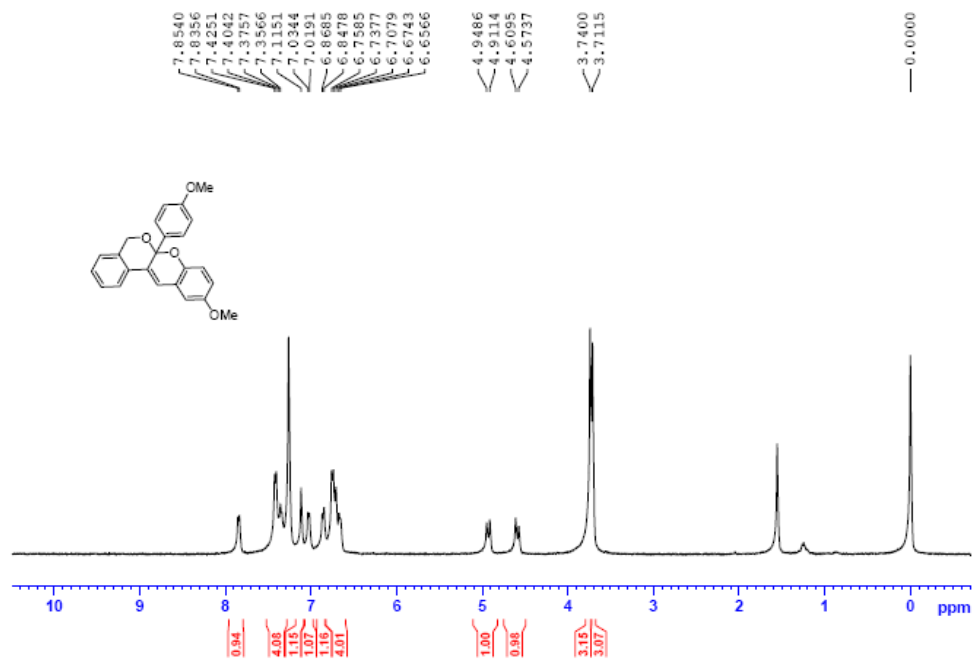

$^{13}\text{C}$  NMR of

10-methoxy-6a-(4-methoxyphenyl)-5,6a-dihydroisochromeno[3,4-*b*]chromene (**3d**).

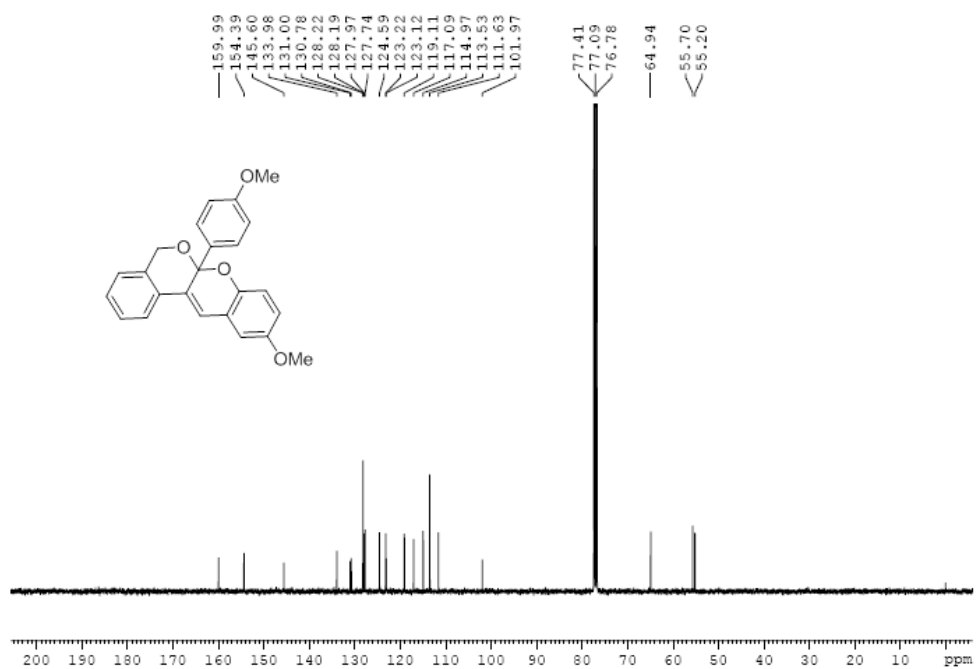

<sup>1</sup>H NMR of 6a-(4-methoxyphenyl)-10-methyl-5,6a-dihydroisochromeno[3,4-*b*]chromene (3e).

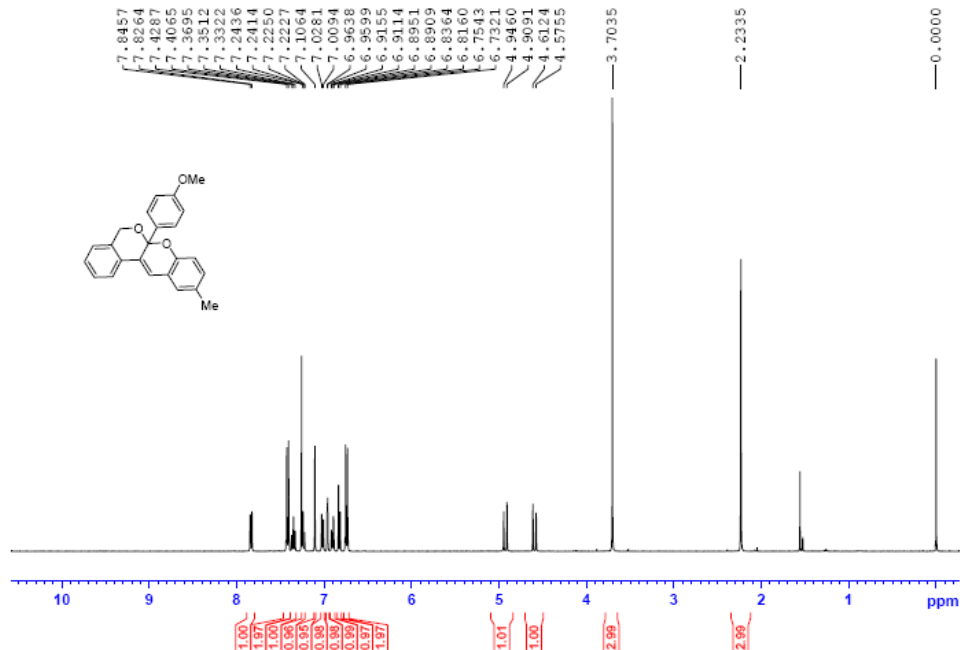

<sup>13</sup>C NMR of 6a-(4-methoxyphenyl)-10-methyl-5,6a-dihydroisochromeno[3,4-*b*]chromene (3e).

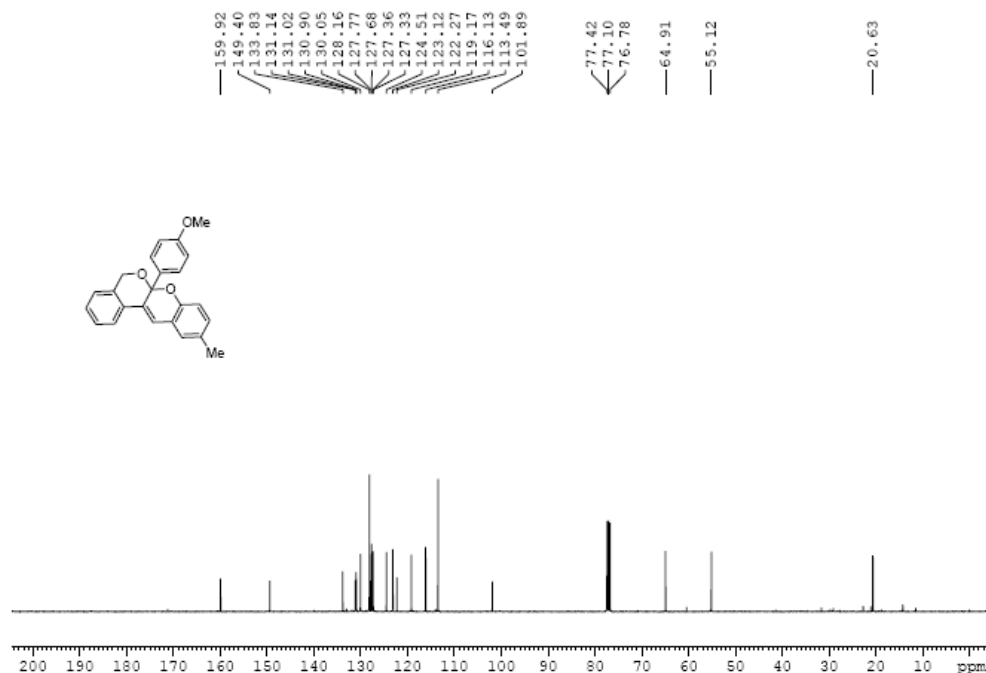

$^1\text{H}$  NMR of 10-bromo-6a-(4-methoxyphenyl)-5,6a-dihydroisochromeno[3,4-*b*]chromene (3f).

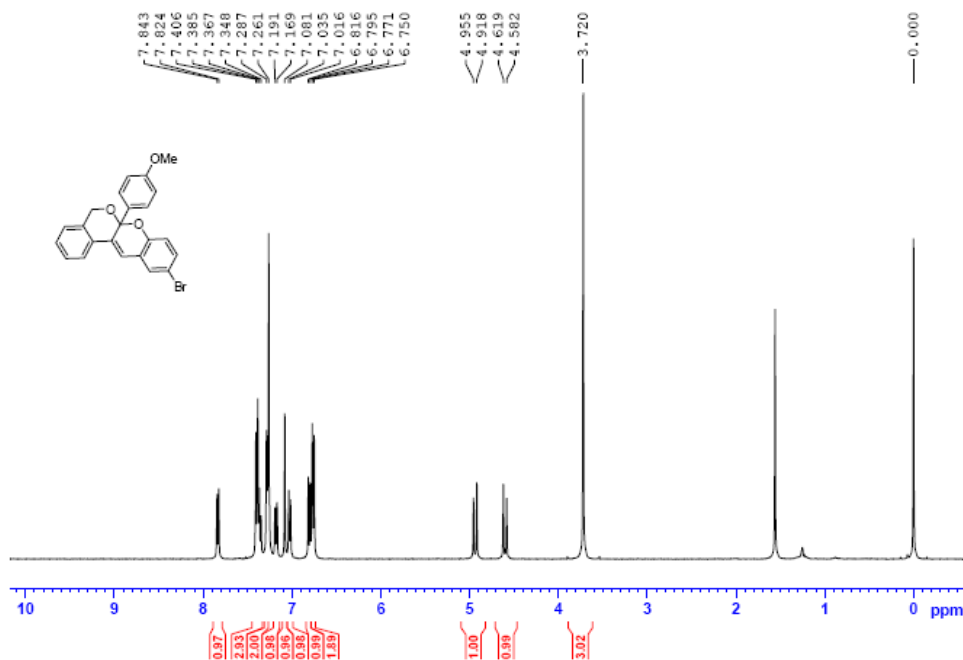

$^{13}\text{C}$  NMR of 10-bromo-6a-(4-methoxyphenyl)-5,6a-dihydroisochromeno[3,4-*b*]chromene (3f).

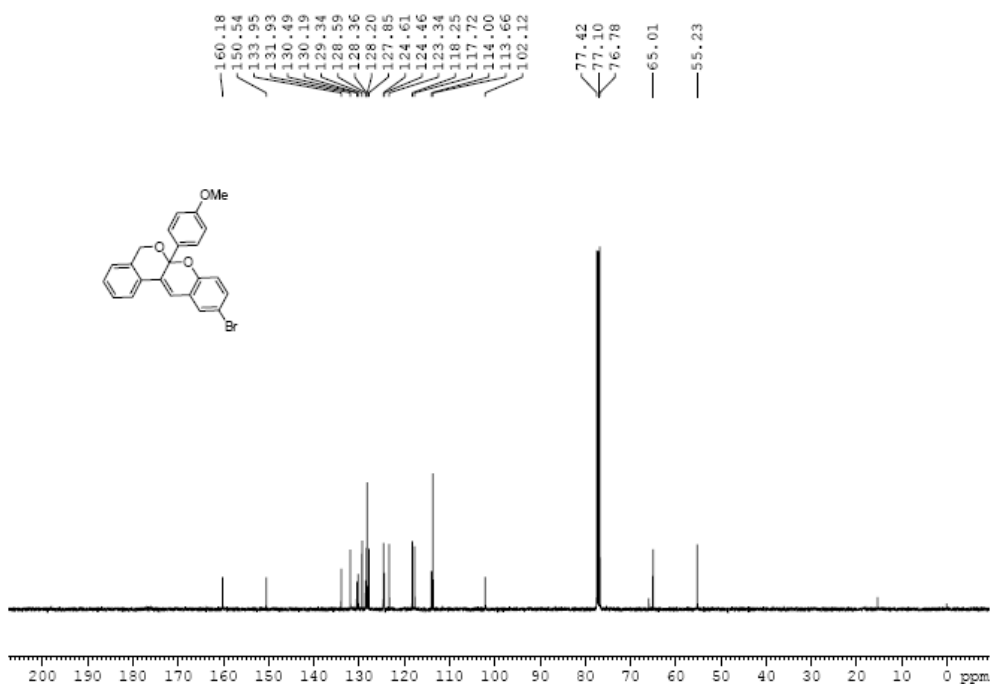

<sup>1</sup>H NMR of 10-fluoro-6a-(4-methoxyphenyl)-5,6a-dihydroisochromeno[3,4-*b*]chromene (**3g**).

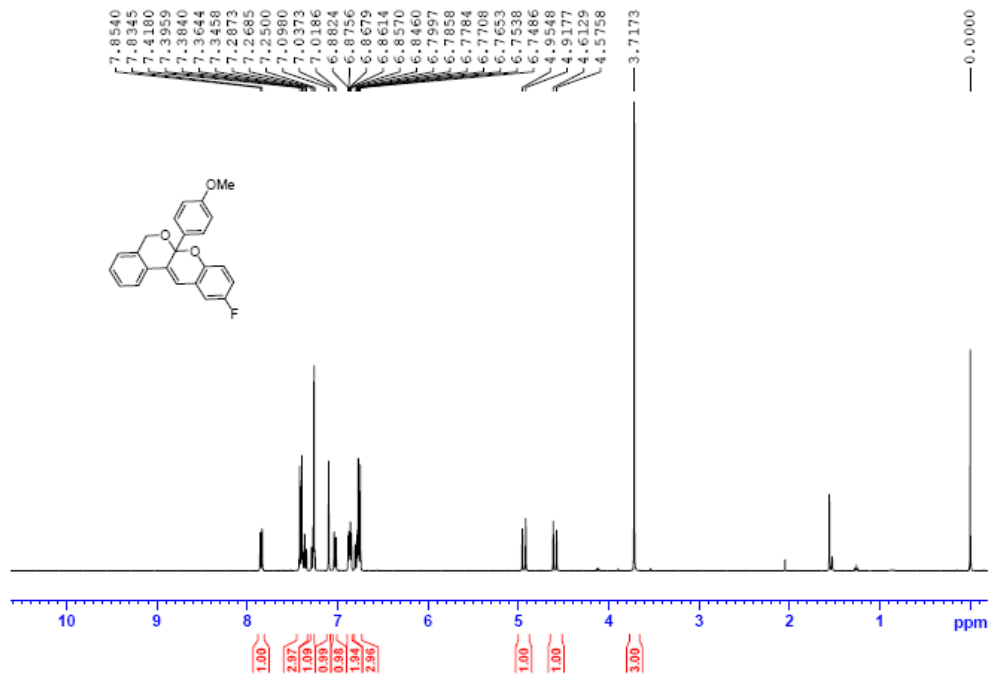

<sup>13</sup>C NMR of 10-fluoro-6a-(4-methoxyphenyl)-5,6a-dihydroisochromeno[3,4-*b*]chromene (**3g**).

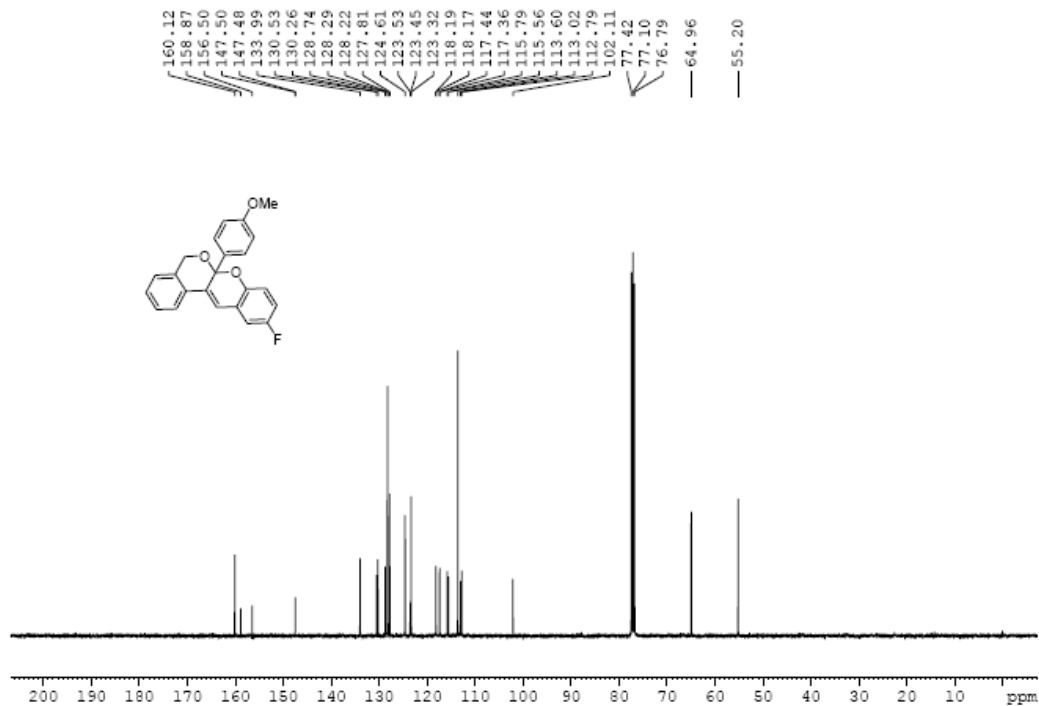

<sup>1</sup>H NMR of 6a-(4-methoxyphenyl)-10-nitro-5,6a-dihydroisochromeno[3,4-*b*]chromene  
(**3h**).

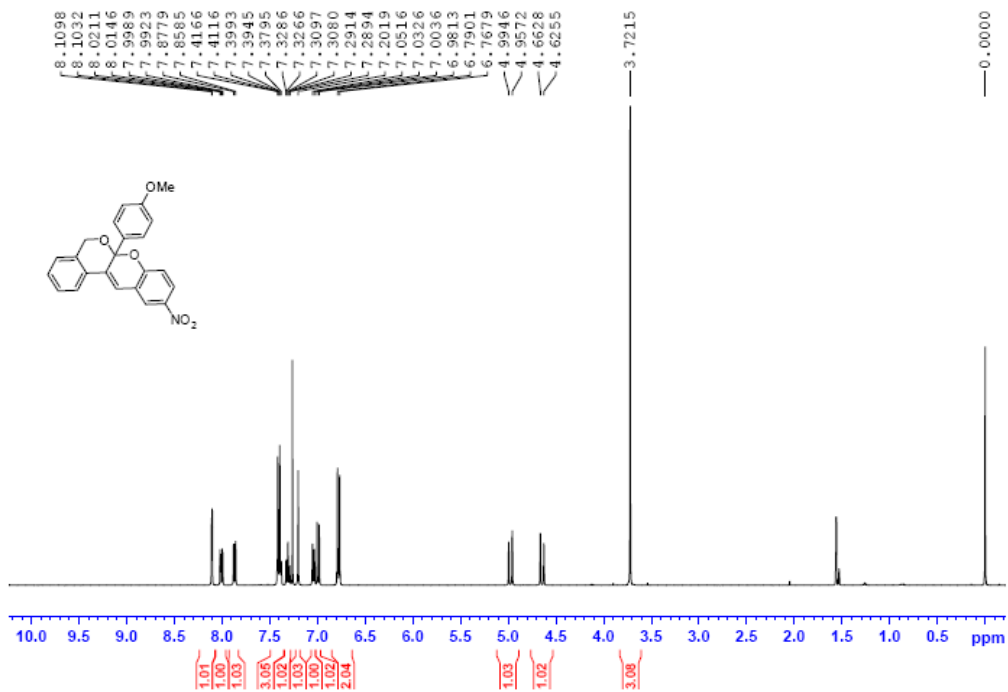

<sup>13</sup>C NMR of 6a-(4-methoxyphenyl)-10-nitro-5,6a-dihydroisochromeno[3,4-*b*]chromene  
(**3h**).

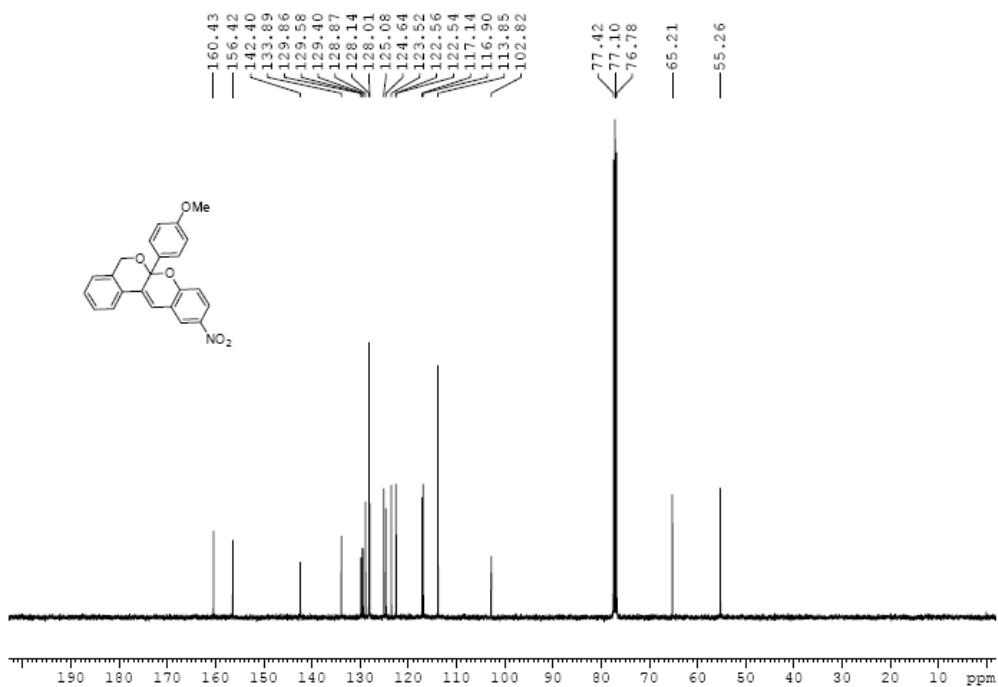

<sup>1</sup>H NMR of 6a-(4-methoxyphenyl)-5,6a-dihydrobenzo[g]isochromeno[3,4-*b*]chromene  
(3i).

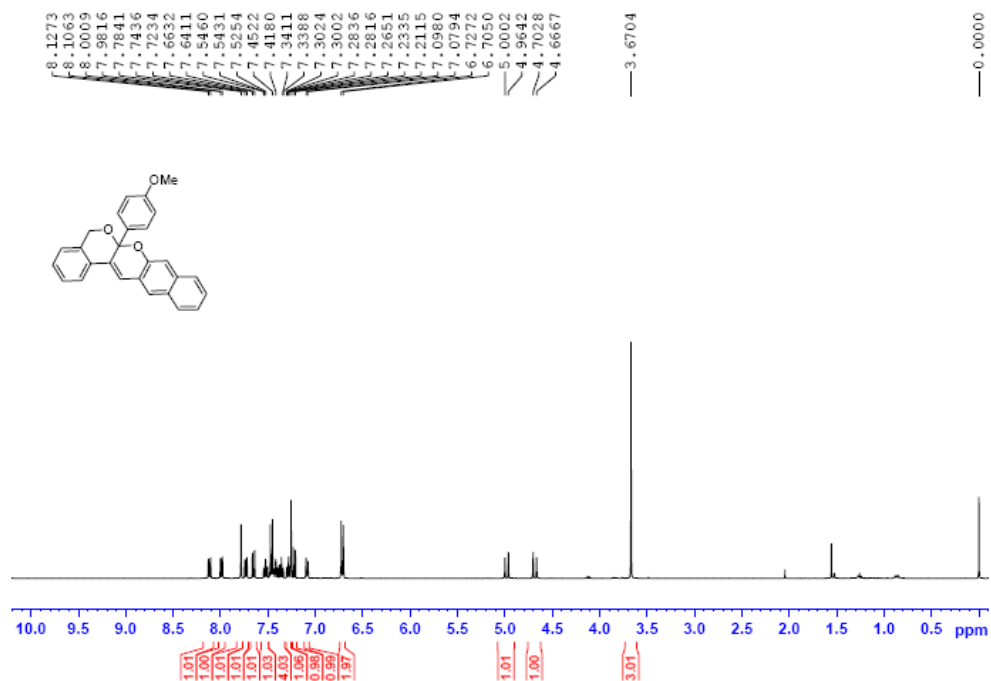

<sup>13</sup>C NMR of 6a-(4-methoxyphenyl)-5,6a-dihydrobenzo[g]isochromeno[3,4-*b*]chromene  
(3i).

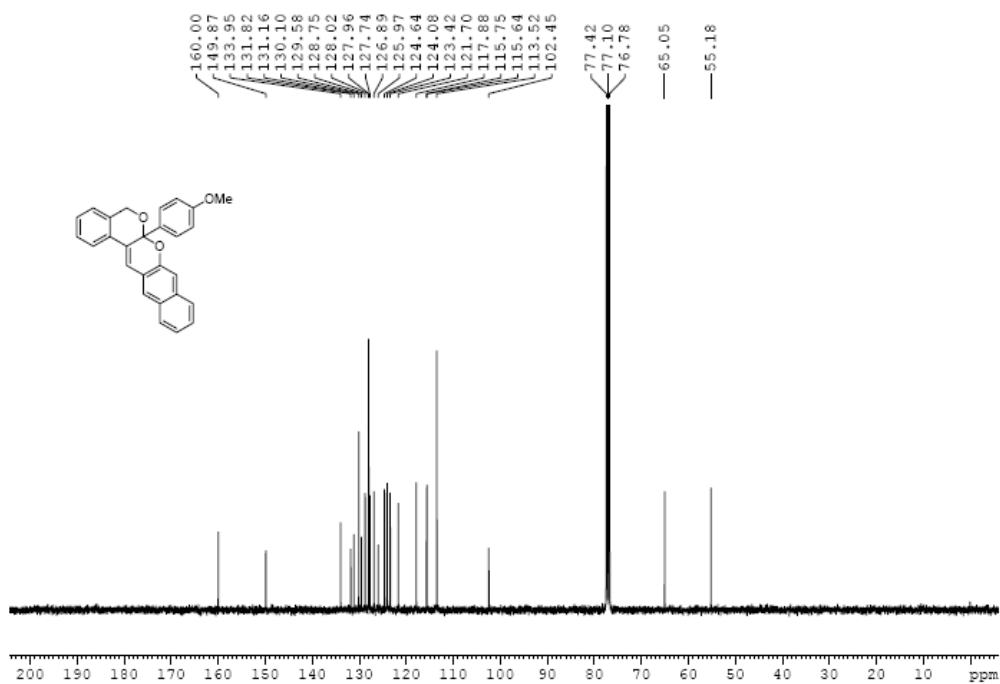



$^1\text{H}$  NMR of 8-bromo-10-chloro-6a-(4-methoxyphenyl)-5,6a-dihydroisochromeno[3,4-*b*]chromene (**3j**).

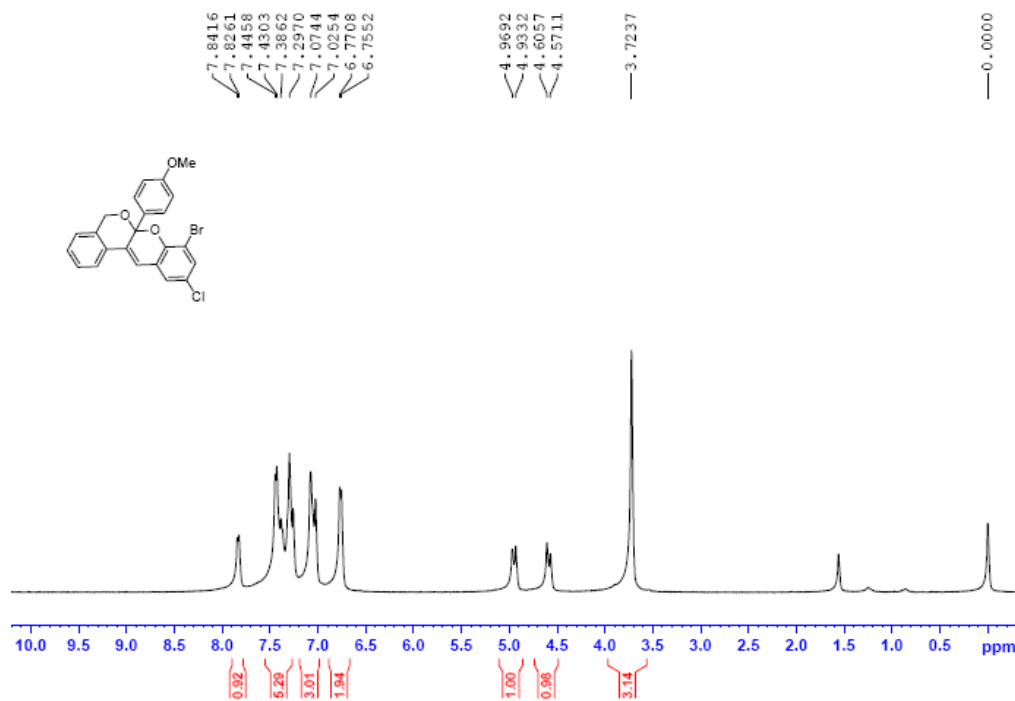

$^{13}\text{C}$  NMR of 8-bromo-10-chloro-6a-(4-methoxyphenyl)-5,6a-dihydroisochromeno[3,4-*b*]chromene (**3j**).

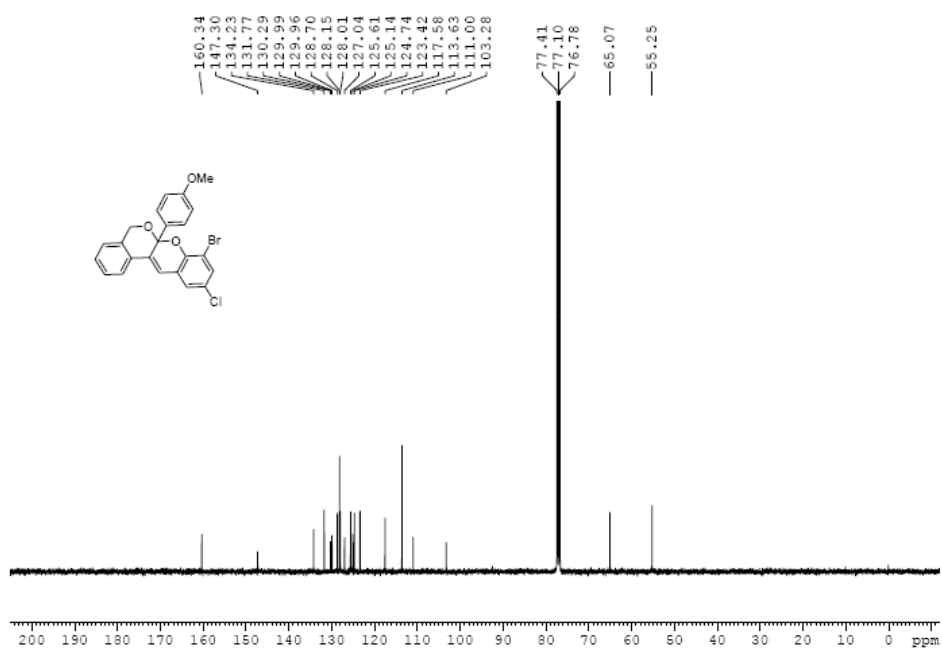

$^1\text{H}$  NMR of

8,10-di-tert-butyl-6a-(4-methoxyphenyl)-5,6a-dihydroisochromeno[3,4-*b*]chromene (**3k**).

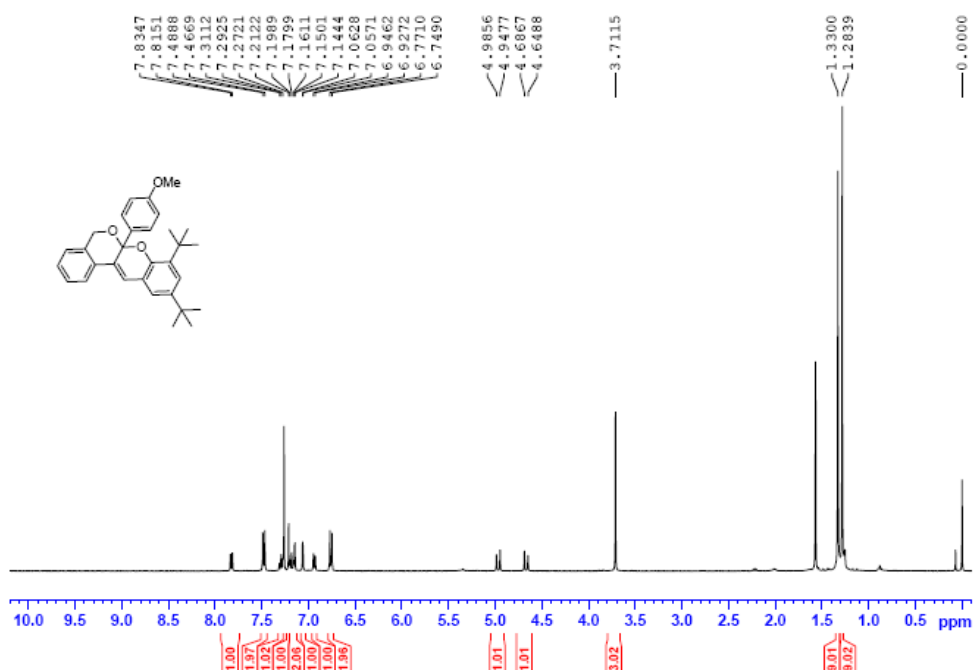

$^{13}\text{C}$  NMR of

8,10-di-tert-butyl-6a-(4-methoxyphenyl)-5,6a-dihydroisochromeno[3,4-*b*]chromene (**3k**).

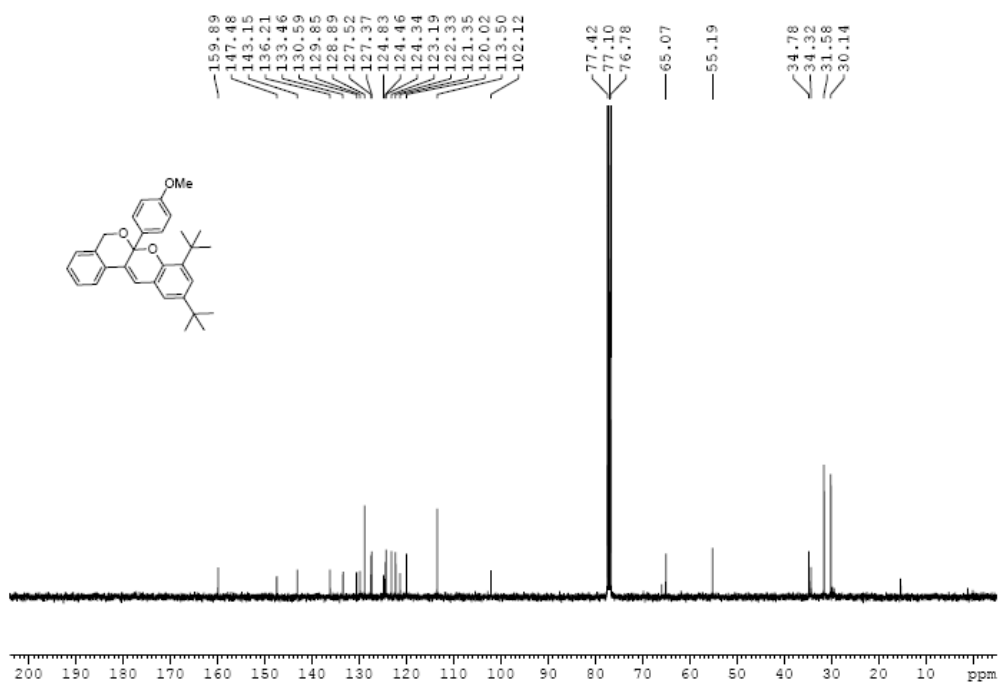

<sup>1</sup>H NMR of 6a-(4-methoxyphenyl)-1-methyl-5,6a-dihydroisochromeno[3,4-b]chromene (3I).

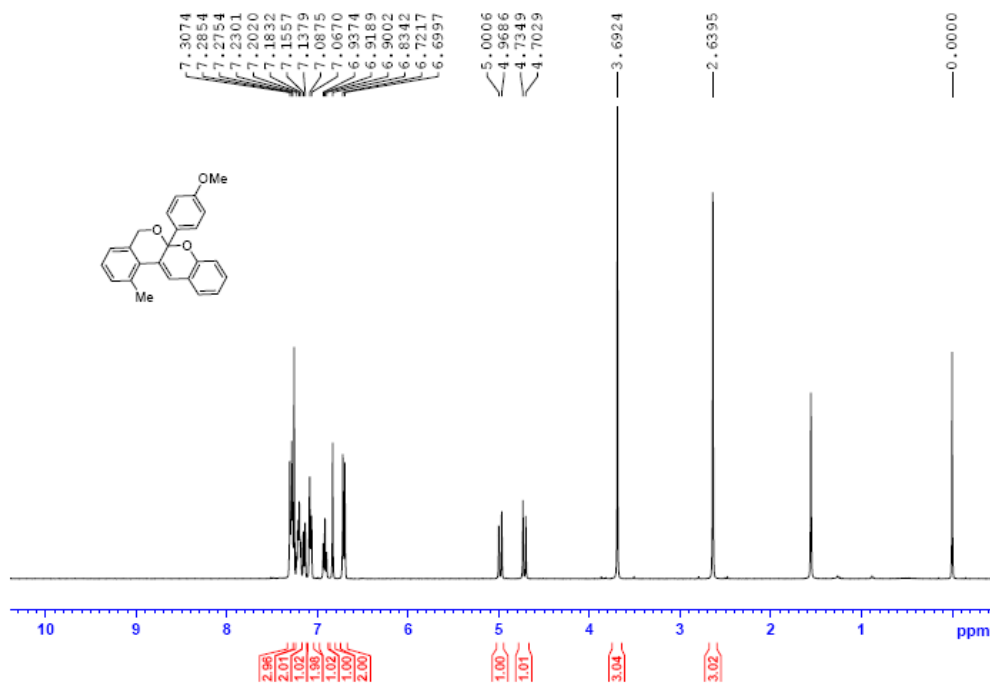

<sup>13</sup>C NMR of 6a-(4-methoxyphenyl)-1-methyl-5,6a-dihydroisochromeno[3,4-b]chromene (3I).

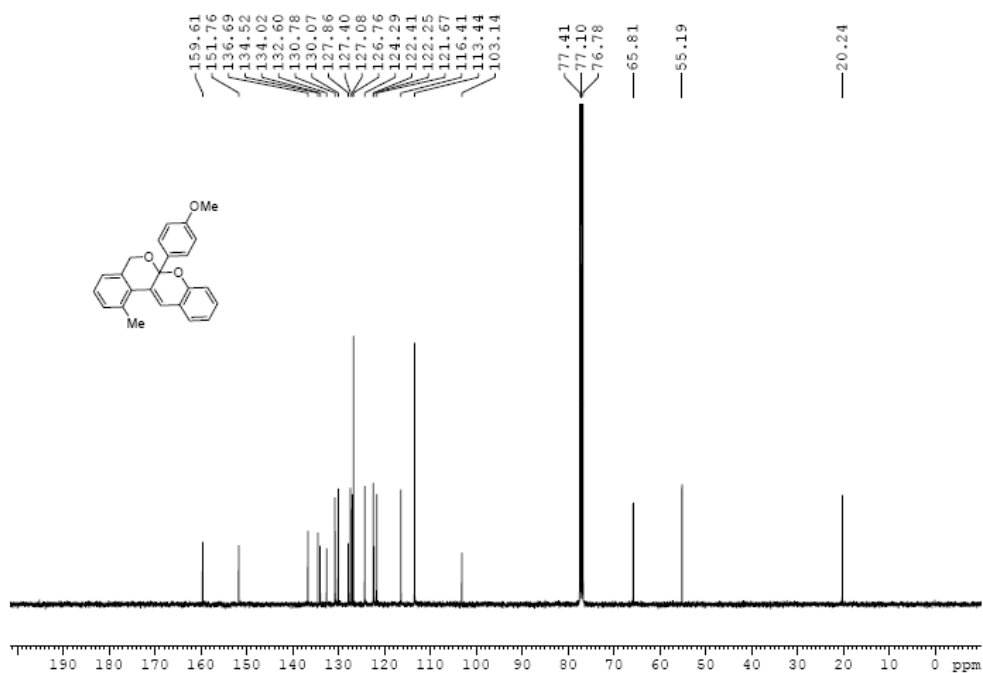

<sup>1</sup>H NMR of 6a-(4-methoxyphenyl)-2-methyl-5,6a-dihydroisochromeno[3,4-*b*]chromene  
(**3m**).

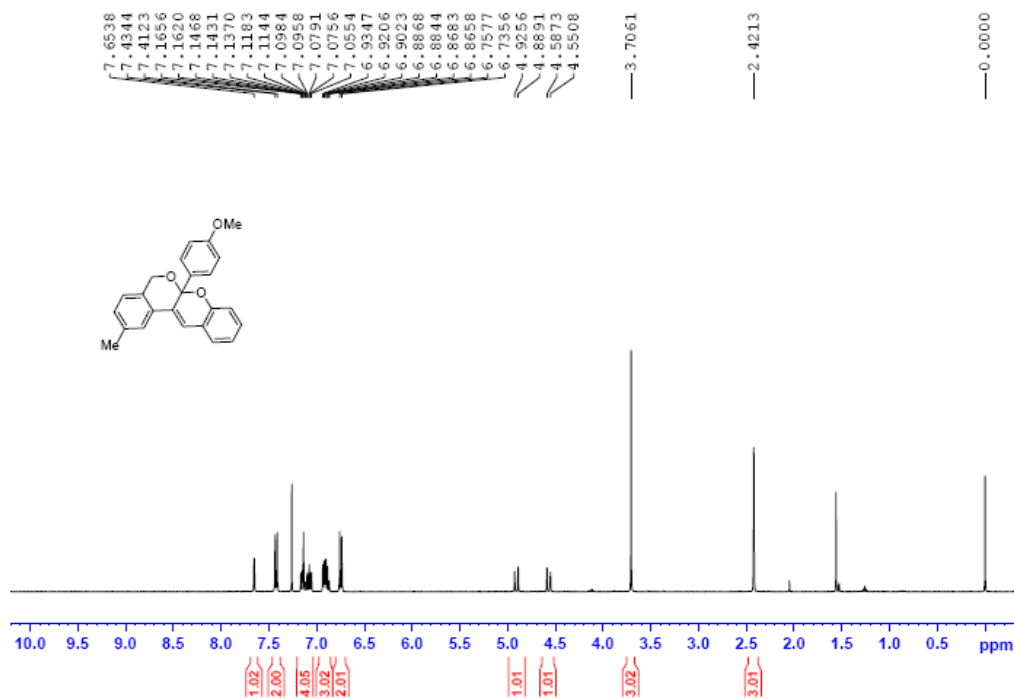

<sup>13</sup>C NMR of 6a-(4-methoxyphenyl)-2-methyl-5,6a-dihydroisochromeno[3,4-*b*]chromene  
(**3m**).

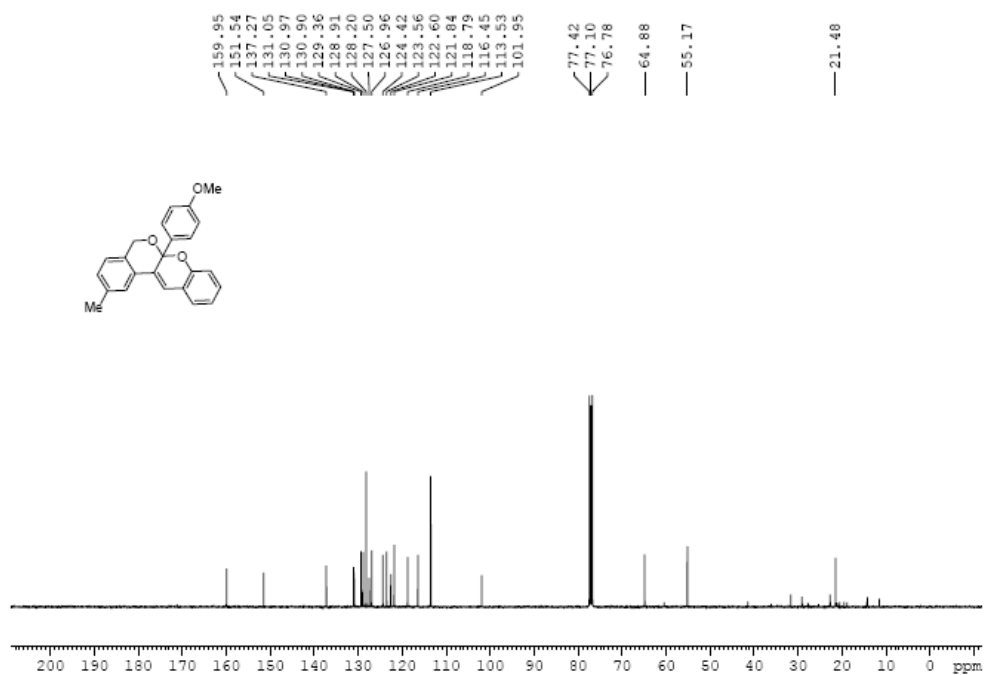

$^1\text{H}$  NMR of 6a-(4-methoxyphenyl)-3-methyl-5,6a-dihydroisochromeno[3,4-*b*]chromene  
(**3n**).

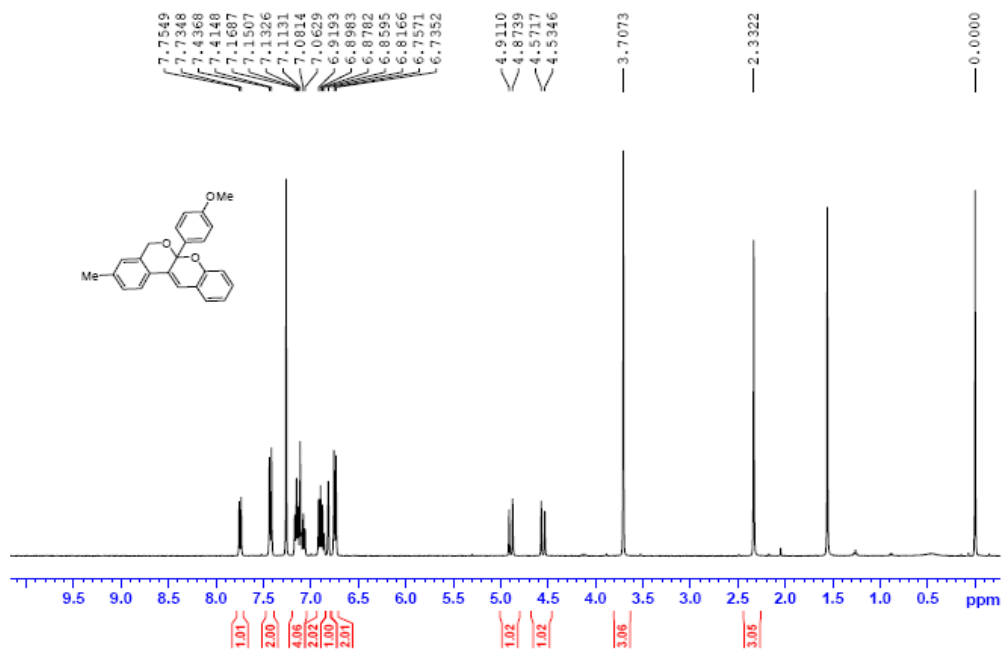

$^{13}\text{C}$  NMR of 6a-(4-methoxyphenyl)-3-methyl-5,6a-dihydroisochromeno[3,4-*b*]chromene  
(**3n**).

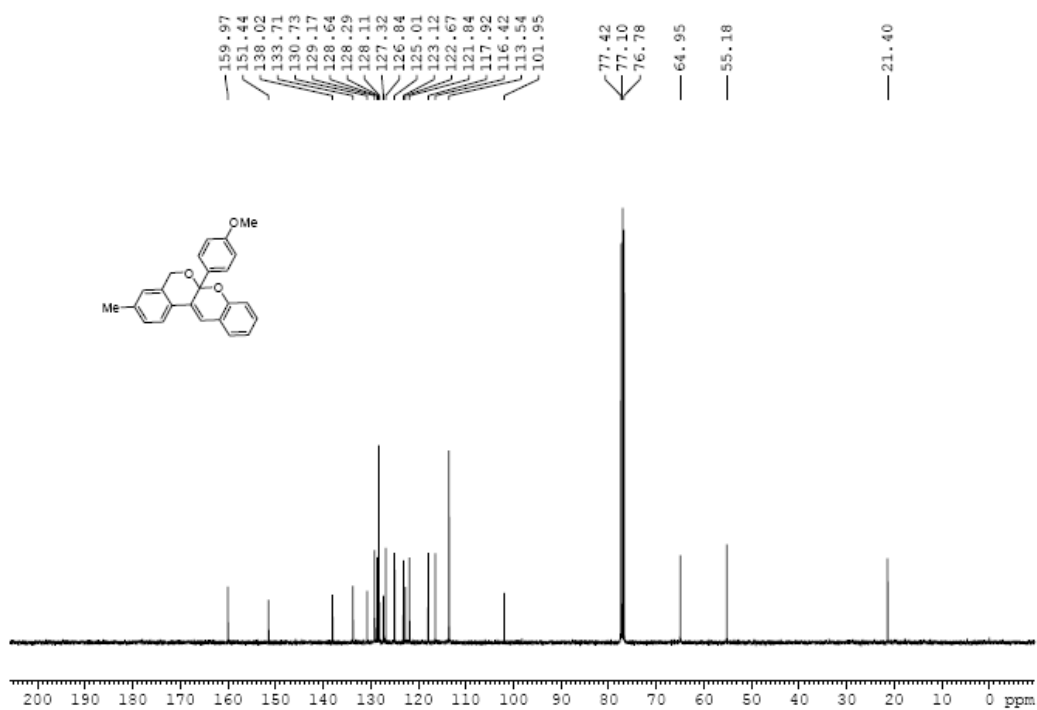

<sup>1</sup>H NMR of 2-fluoro-6a-(4-methoxyphenyl)-5,6a-dihydroisochromeno[3,4-*b*]chromene  
(**30**).

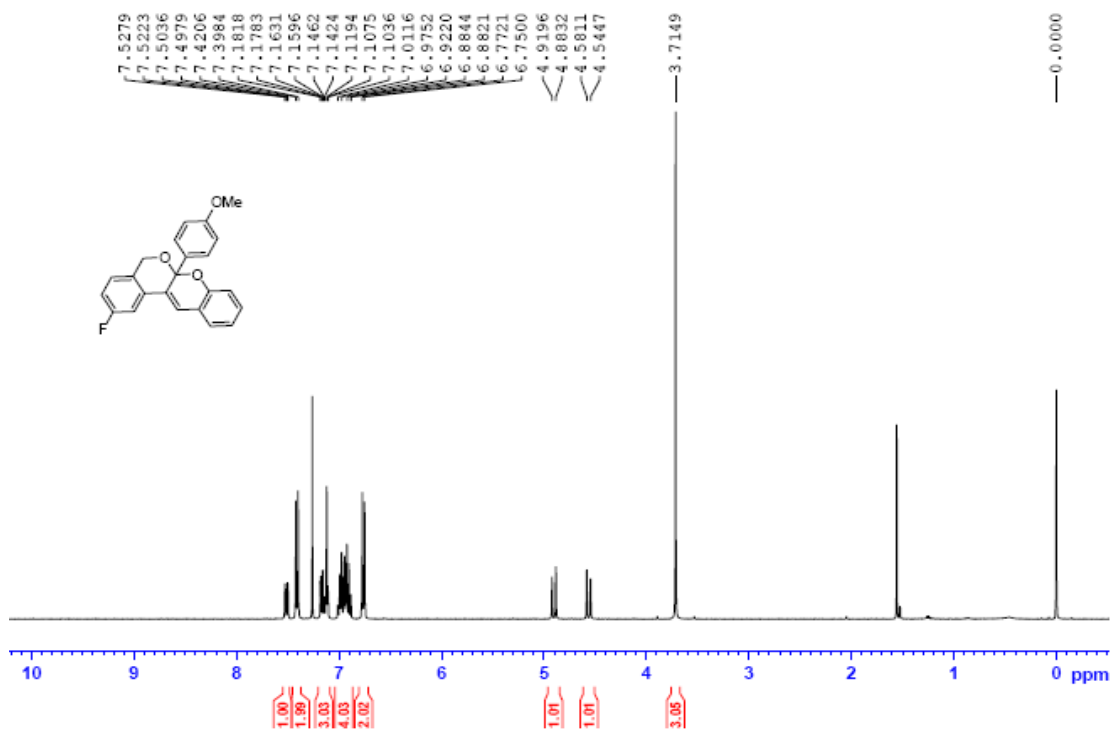

<sup>13</sup>C NMR of 2-fluoro-6a-(4-methoxyphenyl)-5,6a-dihydroisochromeno[3,4-*b*]chromene  
(**30**).

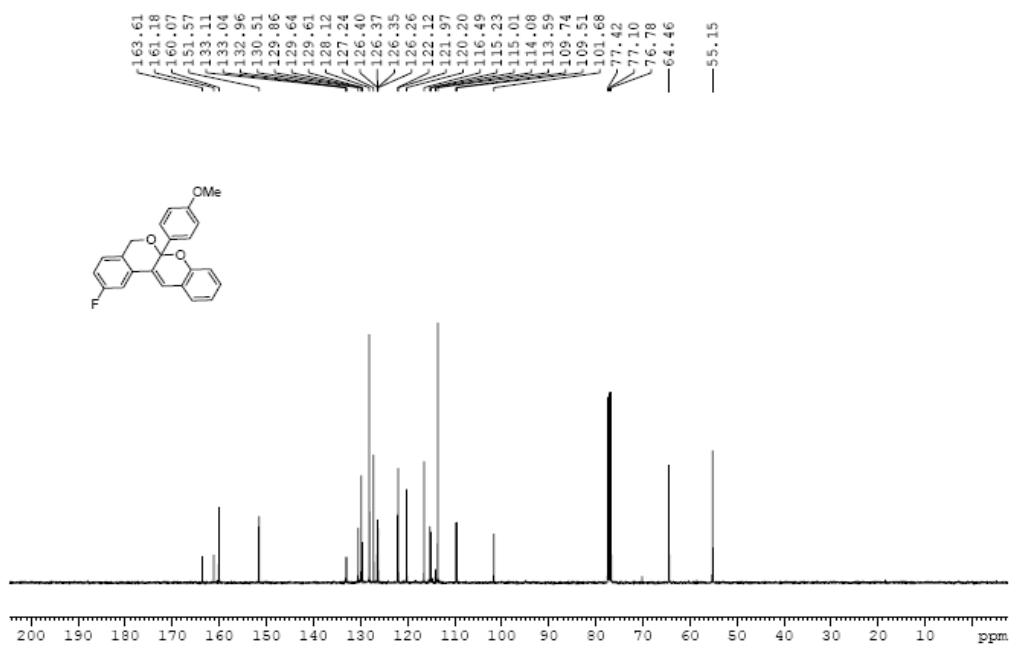

<sup>1</sup>H NMR of 2-chloro-6a-(4-methoxyphenyl)-5,6a-dihydroisochromeno[3,4-*b*]chromene  
(**3p**).

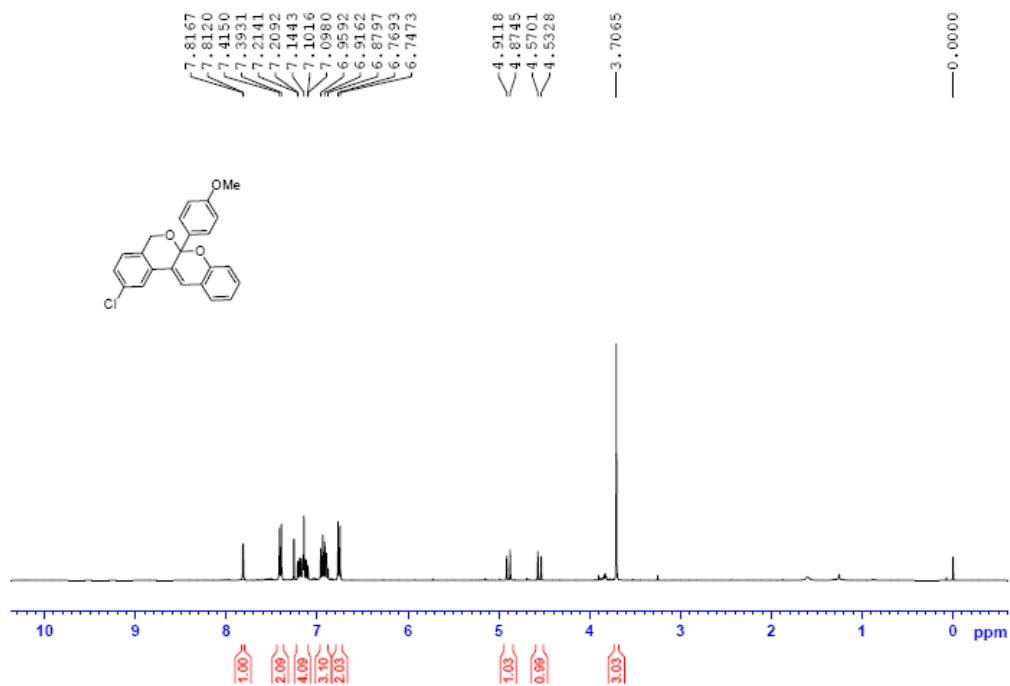

<sup>13</sup>C NMR of 2-chloro-6a-(4-methoxyphenyl)-5,6a-dihydroisochromeno[3,4-*b*]chromene  
(**3p**).

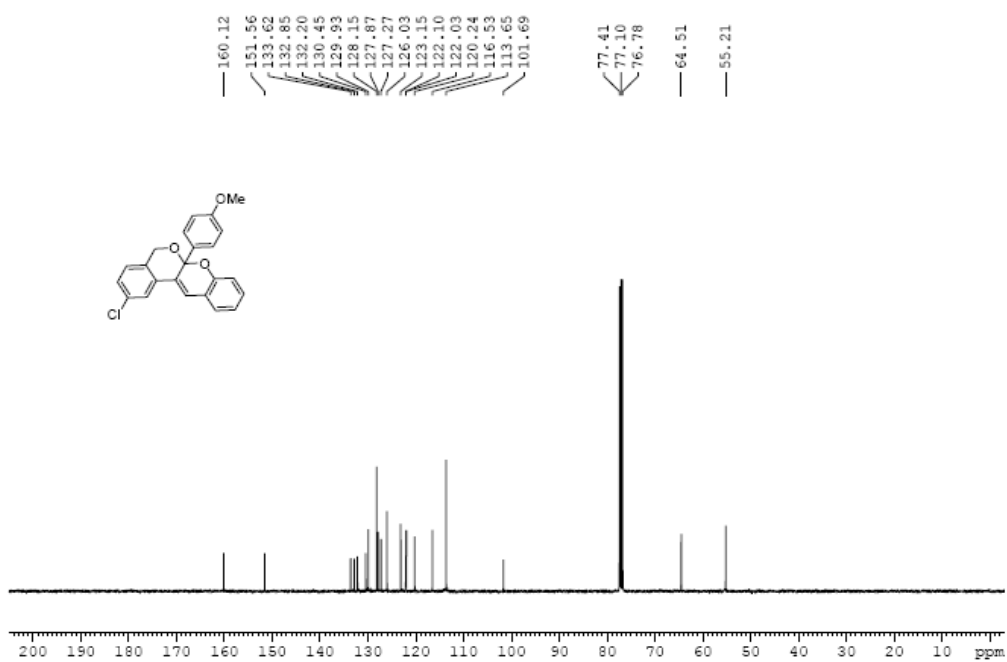

<sup>1</sup>H NMR of 6a-(4-methoxyphenyl)-5-methyl-5,6a-dihydroisochromeno[3,4-*b*]chromene  
(3q).

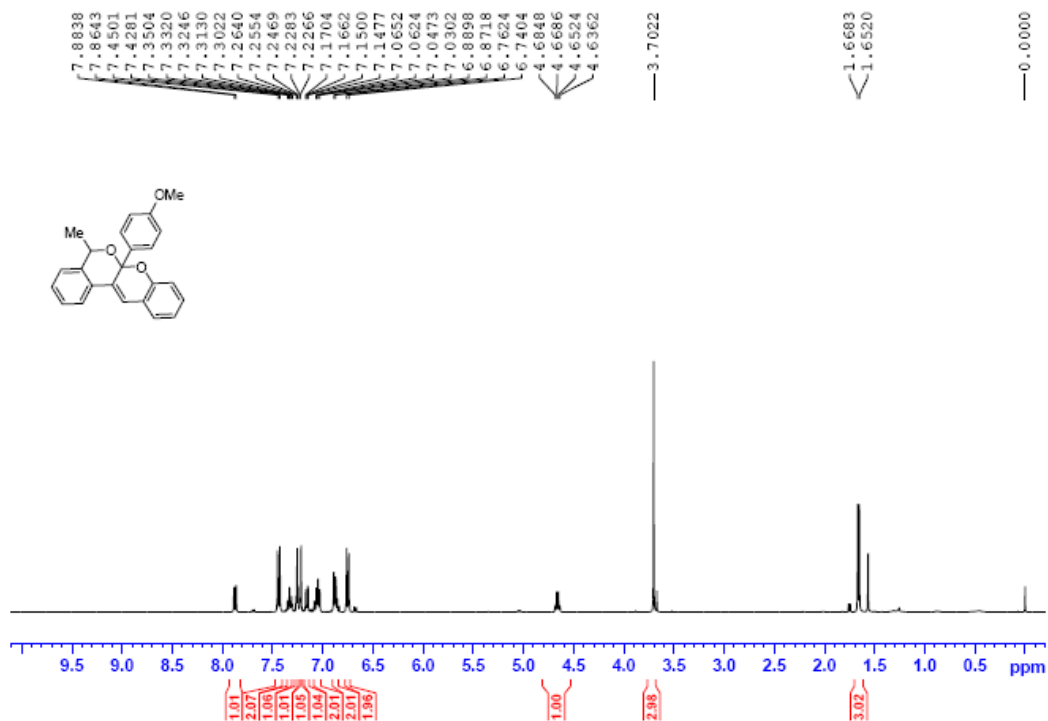

<sup>13</sup>C NMR of 6a-(4-methoxyphenyl)-5-methyl-5,6a-dihydroisochromeno[3,4-*b*]chromene  
(3q).

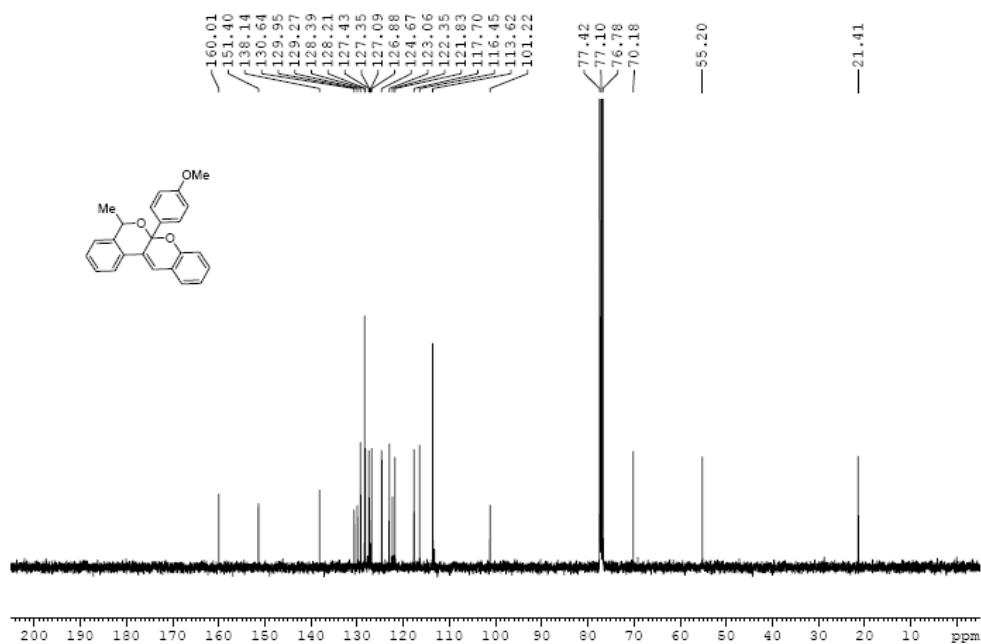



<sup>1</sup>H NMR of 6a-phenyl-5,6a-dihydroisochromeno[3,4-*b*]chromene (**3r**).

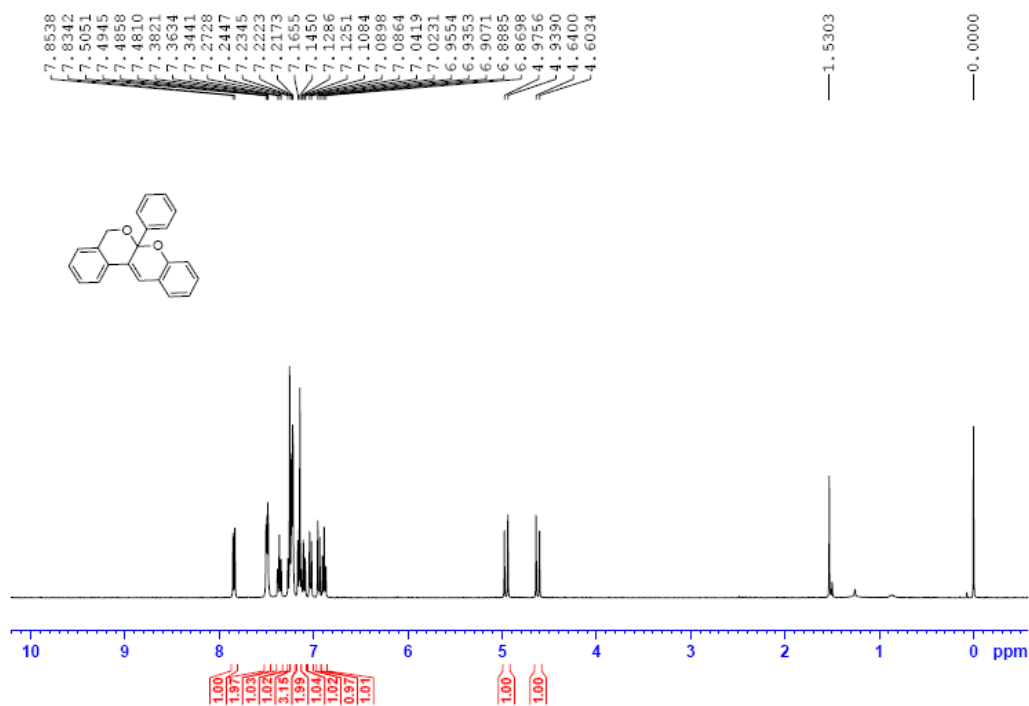

<sup>13</sup>C NMR of 6a-phenyl-5,6a-dihydroisochromeno[3,4-*b*]chromene (**3r**).

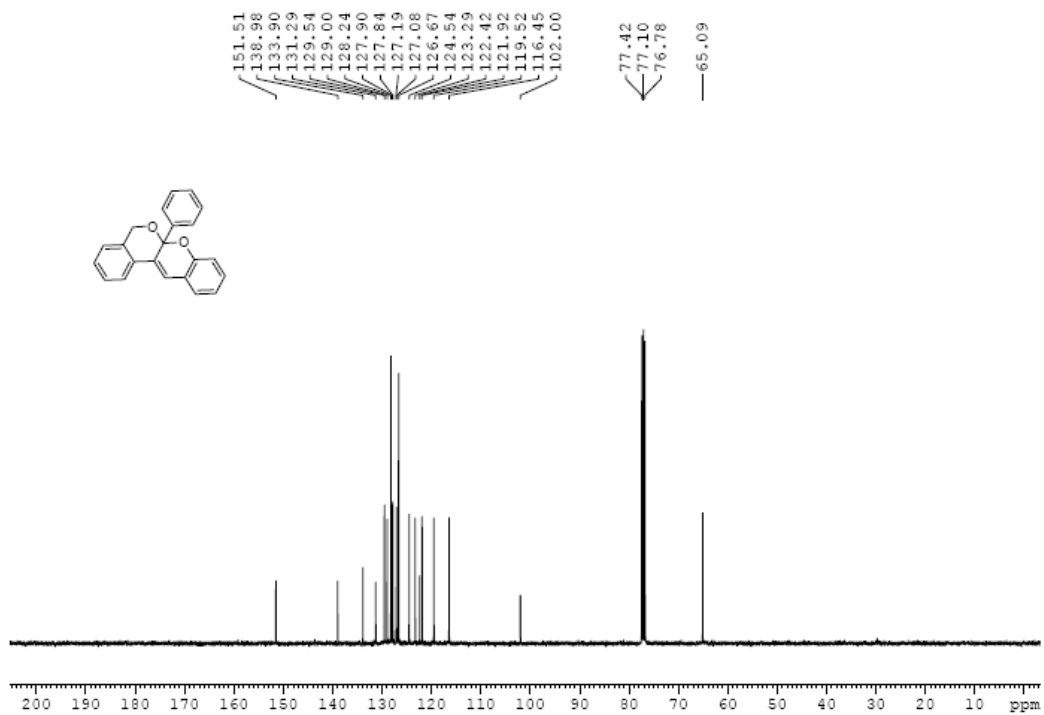

$^1\text{H}$  NMR of 6a-(*p*-tolyl)-5,6a-dihydroisochromeno[3,4-*b*]chromene (**3s**).

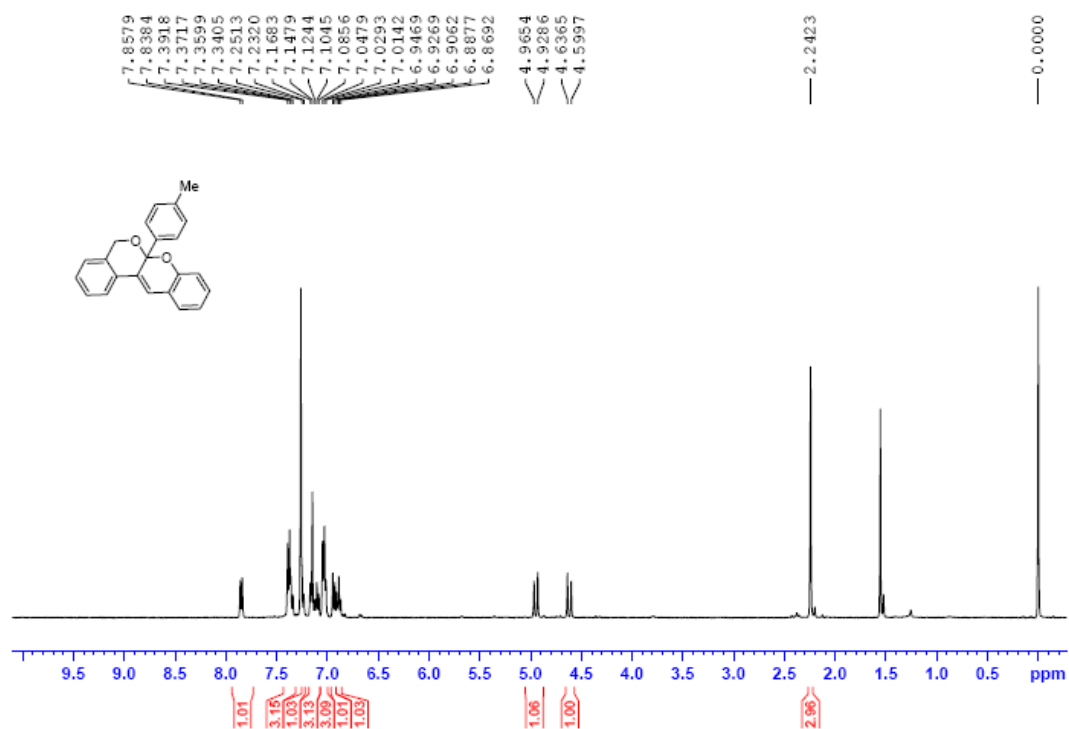

$^{13}\text{C}$  NMR of 6a-(*p*-tolyl)-5,6a-dihydroisochromeno[3,4-*b*]chromene (**3s**).

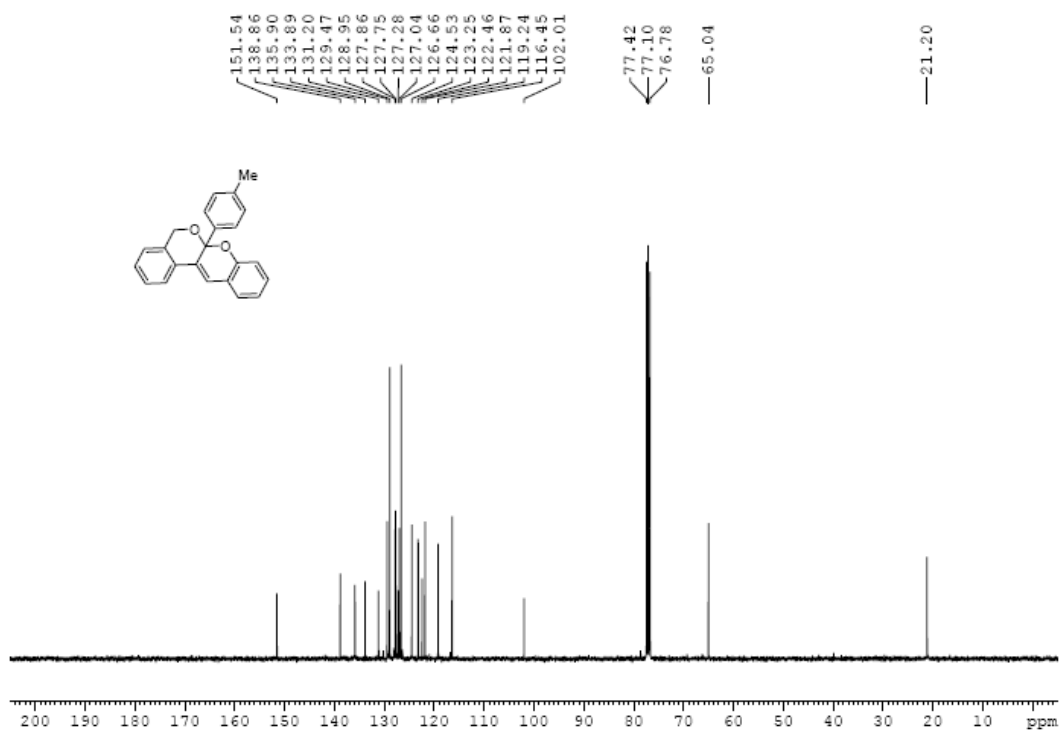

$^1\text{H}$  NMR of 6a-(naphthalen-2-yl)-5,6a-dihydroisochromeno[3,4-*b*]chromene (**3t**).

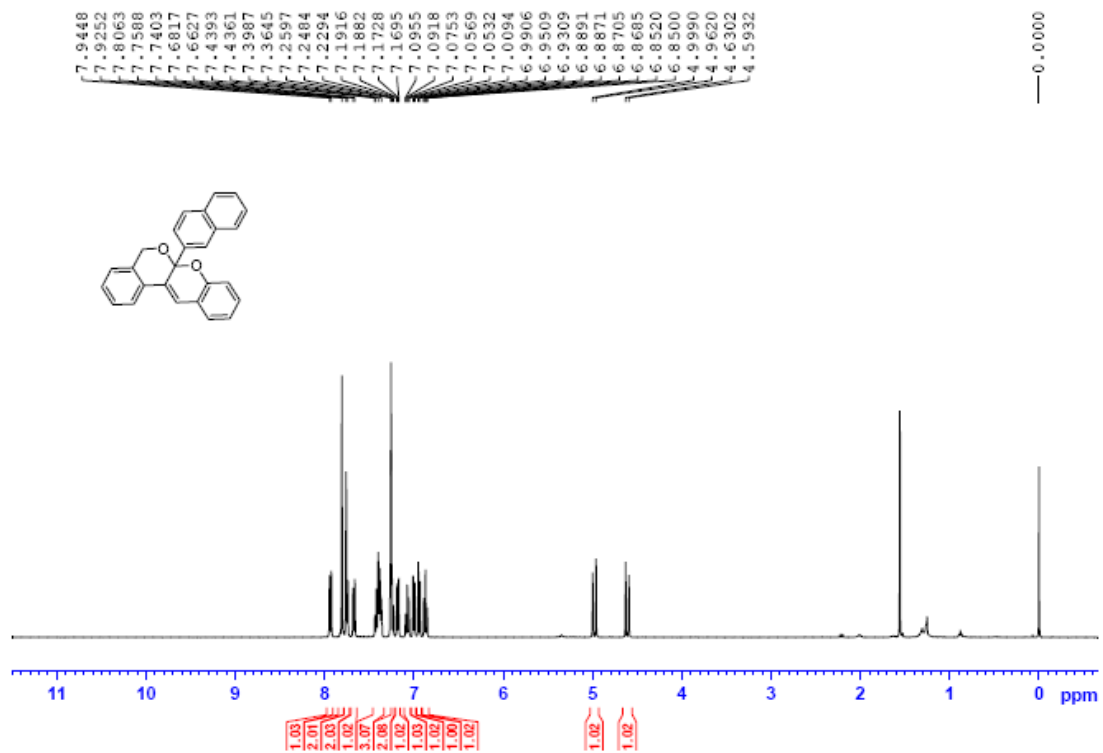

$^{13}\text{C}$  NMR of 6a-(naphthalen-2-yl)-5,6a-dihydroisochromeno[3,4-*b*]chromene (**3t**).

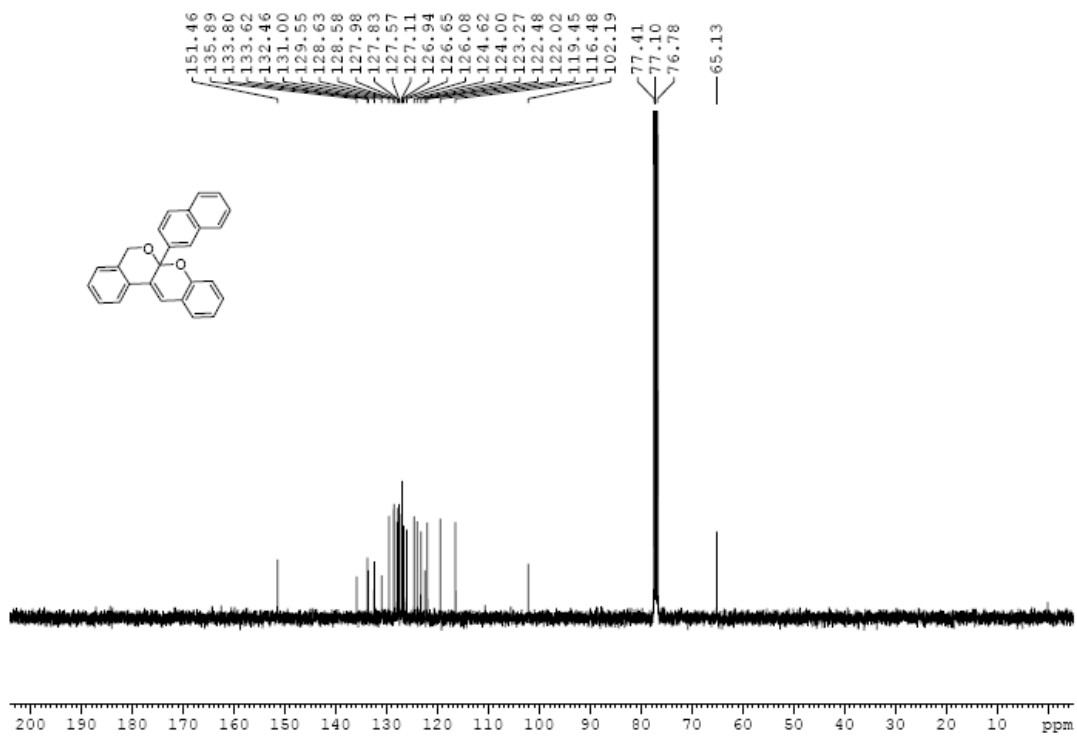

$^1\text{H}$  NMR of 6a-(4-pentylphenyl)-5,6a-dihydroisochromeno[3,4-*b*]chromene (**3u**).

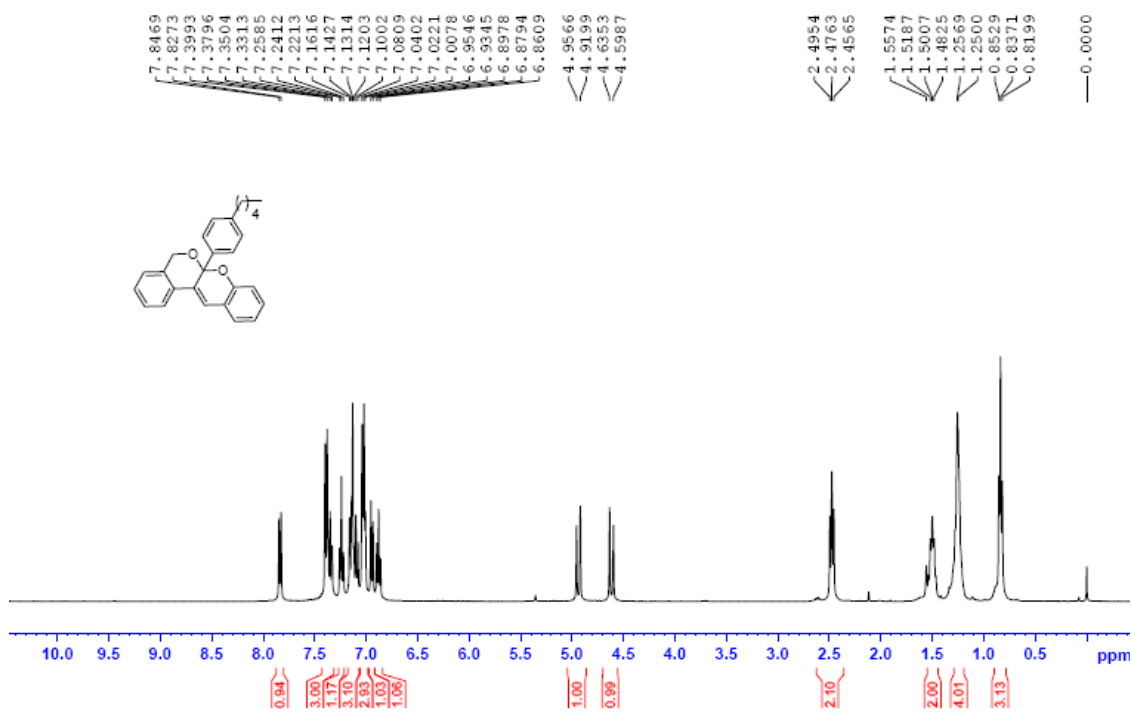

$^{13}\text{C}$  NMR of 6a-(4-pentylphenyl)-5,6a-dihydroisochromeno[3,4-*b*]chromene (**3u**).

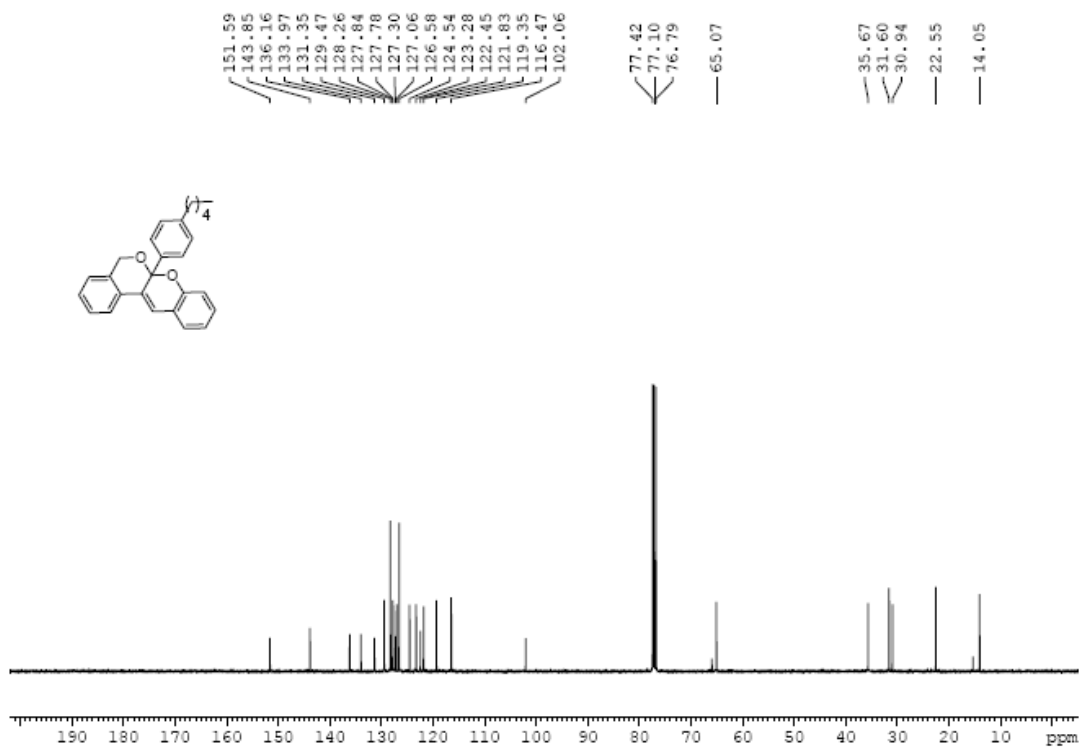

$^1\text{H}$  NMR of 5a-(4-methoxyphenyl)-2,3,4,5a-tetrahydro-1H-cyclopenta[4,5]pyrano[2,3-*b*]chromene (**3v**).

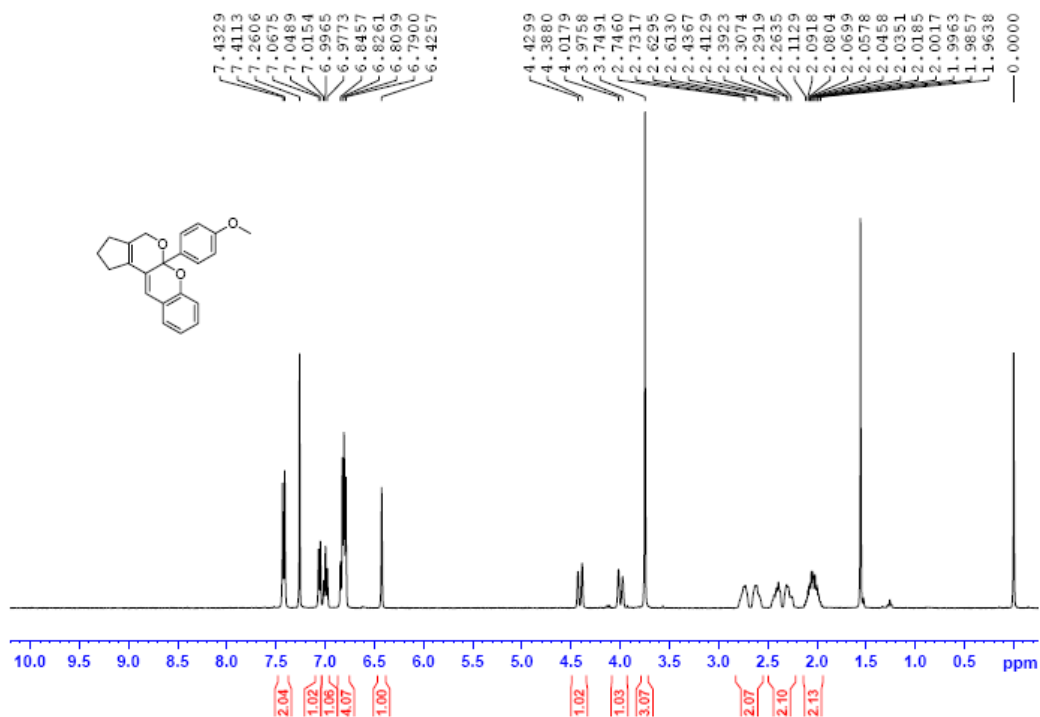

$^{13}\text{C}$  NMR of 5a-(4-methoxyphenyl)-2,3,4,5a-tetrahydro-1H-cyclopenta[4,5]pyrano[2,3-*b*]chromene (**3v**).

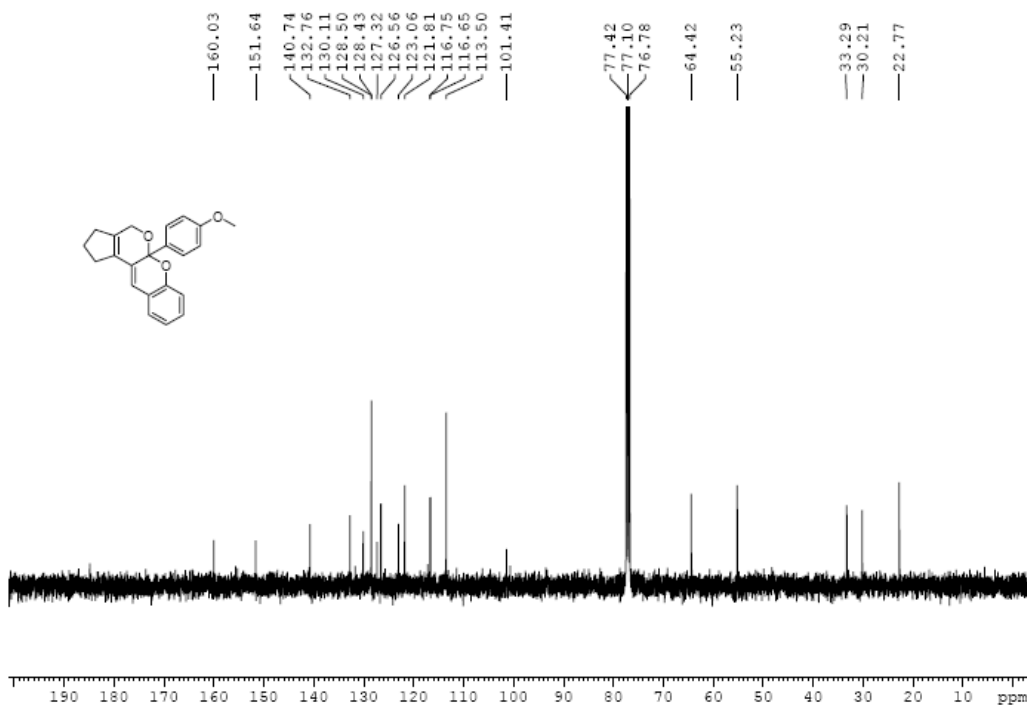

$^1\text{H}$  NMR of 6a-(4-methoxyphenyl)-1,2,3,4,5,6a-hexahydroisochromeno[3,4-*b*]chromene (**3w**).

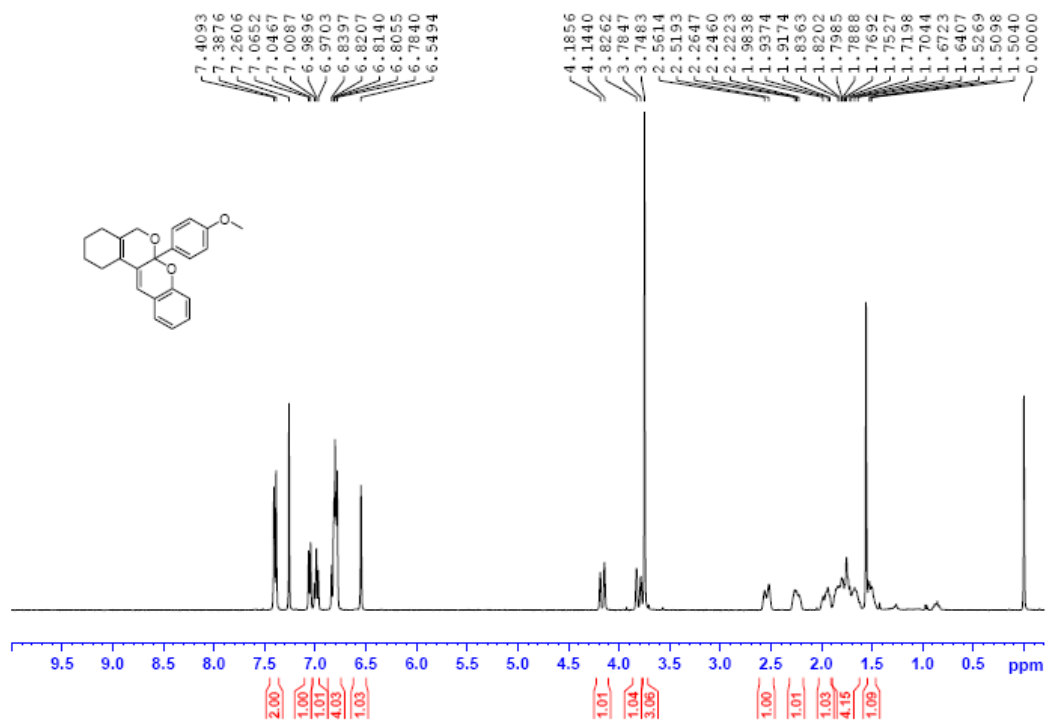

$^{13}\text{C}$  NMR of 6a-(4-methoxyphenyl)-1,2,3,4,5,6a-hexahydroisochromeno[3,4-*b*]chromene (**3w**).

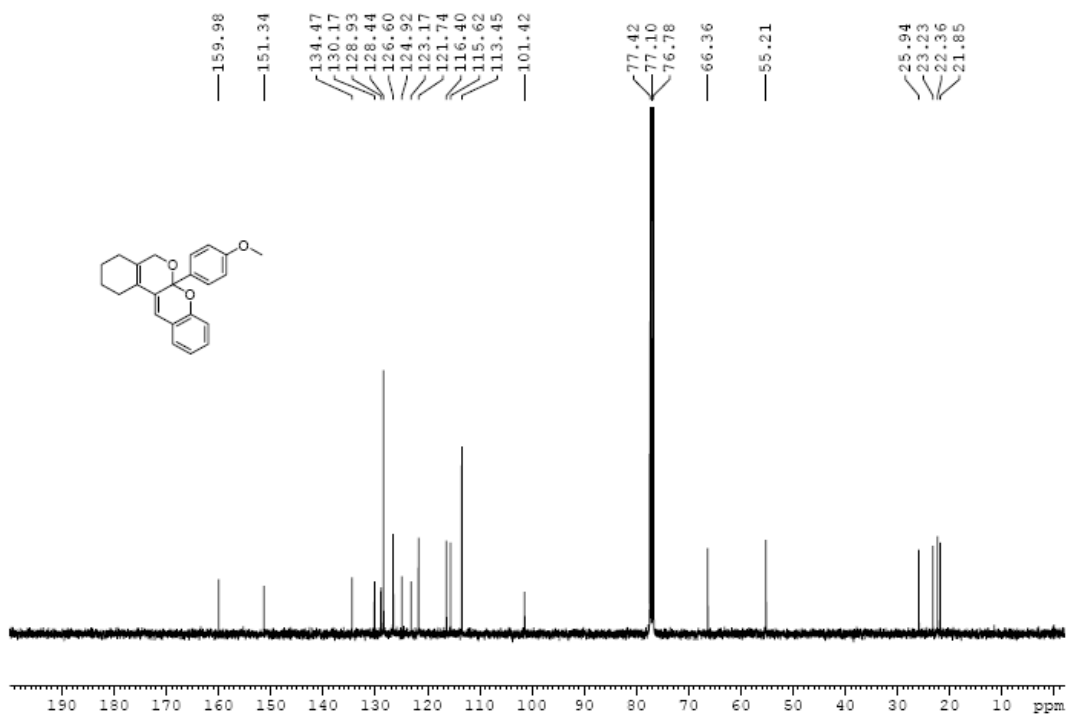

$^1\text{H}$  NMR of 6a-(thiophen-2-yl)-5,6a-dihydroisochromeno[3,4-*b*]chromene (**3x**).

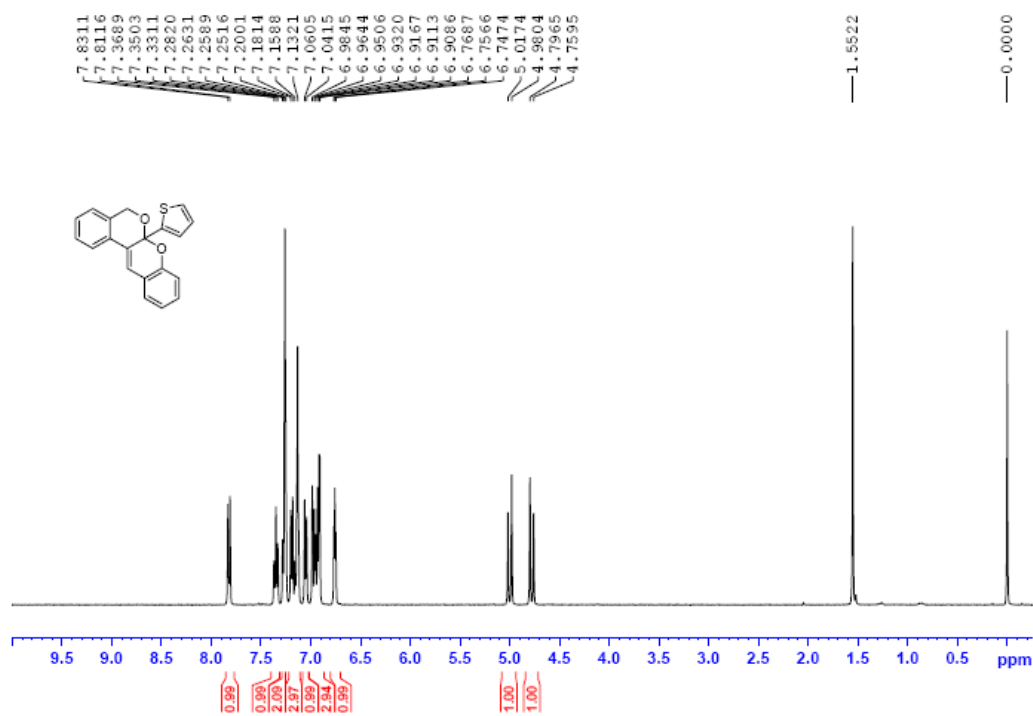

$^{13}\text{C}$  NMR of 6a-(thiophen-2-yl)-5,6a-dihydroisochromeno[3,4-*b*]chromene (**3x**).

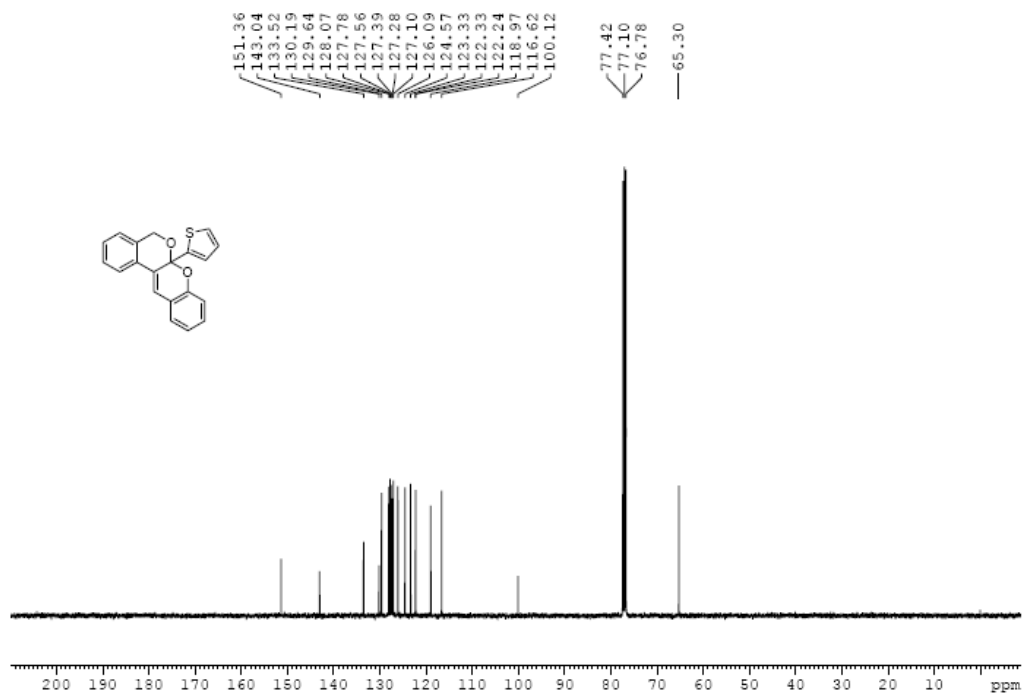

Supplement: c4cc02862g1.pdf [file c4cc02862g1.pdf]
